# Supplementary material for: Effect of aryloxo substituents in ethylene polymerisation by tris(pyrazolyl)borate titanium(IV) complexes containing aryloxo ligands of type, TpTiCl2(OAr)
Source: Royal Society of Chemistry journal article supplement (doi:10.1039/b910395c), 2009-01-01
Supplement: b910395c.pdf [file b910395c.pdf]

Electronic Supplementary Information (ESI)

**Effect of Aryloxo Substituents in Ethylene Polymerization by Tris(pyrazolyl)borate  
Titanium(IV) Complexes Containing Aryloxo Ligands of Type,  $\text{TpTiCl}_2(\text{OAr})$**

Kotohiro Nomura,\* Shinya Hasumi, Michiya Fujiki and Koji Itagaki

*Graduate School of Materials Science, Nara Institute of Science and Technology (NAIST),*

*8916-5 Takayama, Ikoma, Nara 630-0101, Japan*

**Contents**

Crystal structure reports for  $\text{TpTiCl}_2(\text{OC}_6\text{F}_5)$  (**3**) and  $\text{TpTiCl}_2(\text{O-2,6-Ph}_2\text{C}_6\text{H}_3)$  (**4**).

X-ray Structure Report for  $\text{TpTiCl}_2(\text{OC}_6\text{F}_5)$  (**3**)

August 21, 2009

## Experimental

### Data Collection

A red block crystal of  $C_{16}H_{10}BCl_4F_5N_6O$  having approximate dimensions of 0.40 x 0.20 x 0.12 mm was mounted on a glass fiber. All measurements were made on a Rigaku RAXIS RAPID imaging plate area detector with graphite monochromated Mo- $K\alpha$  radiation.

Indexing was performed from 3 oscillations that were exposed for 200 seconds. The crystal-to-detector distance was 127.40 mm.

Cell constants and an orientation matrix for data collection corresponded to a primitive monoclinic cell with dimensions:

$$\begin{aligned} a &= 11.5340(4) \text{ \AA} \\ b &= 12.9265(4) \text{ \AA} & \beta &= 98.7577(12)^\circ \\ c &= 15.6367(7) \text{ \AA} \\ V &= 2304.15(15) \text{ \AA}^3 \end{aligned}$$

For  $Z = 4$  and F.W. = 597.81, the calculated density is 1.723 g/cm<sup>3</sup>. The systematic absences of:

$$\begin{aligned} h0l: & l \pm 2n \\ 0k0: & k \pm 2n \end{aligned}$$

uniquely determine the space group to be:

$$P2_1/c \text{ (\#14)}$$

The data were collected at a temperature of  $-80 \pm 1^\circ\text{C}$  to a maximum  $2\theta$  value of  $50.6^\circ$ . A total of 74 oscillation images were collected. A sweep of data was done using  $\omega$  scans from  $130.0$  to  $190.0^\circ$  in  $3.0^\circ$  step, at  $\chi=45.0^\circ$  and  $\phi = 0.0^\circ$ . The exposure rate was  $280.0$  [sec./ $^\circ$ ]. A second sweep was performed using  $\omega$  scans from  $0.0$  to  $162.0^\circ$  in  $3.0^\circ$  step, at  $\chi=45.0^\circ$  and  $\phi = 180.0^\circ$ . The exposure rate was  $280.0$  [sec./ $^\circ$ ]. The crystal-to-detector distance was 127.40 mm. Readout was performed in the 0.100 mm pixel mode.

### Data Reduction

Of the 18147 reflections that were collected, 4185 were unique ( $R_{\text{int}} = 0.021$ ); equivalent reflections were merged.

The linear absorption coefficient,  $\mu$ , for Mo-K $\alpha$  radiation is 8.980 cm<sup>-1</sup>. An empirical absorption correction was applied which resulted in transmission factors ranging from 0.718 to 0.898. The data were corrected for Lorentz and polarization effects.

### Structure Solution and Refinement

The structure was solved by direct methods<sup>1</sup> and expanded using Fourier techniques<sup>2</sup>. The non-hydrogen atoms were refined anisotropically. Hydrogen atoms were refined using the riding model. The final cycle of full-matrix least-squares refinement<sup>3</sup> on  $F^2$  was based on 4185 observed reflections and 326 variable parameters and converged (largest parameter shift was 0.00 times its esd) with unweighted and weighted agreement factors of:

$$R1 = \sum ||F_o| - |F_c|| / \sum |F_o| = 0.0624$$

$$wR2 = [ \sum ( w (F_o^2 - F_c^2)^2 ) / \sum w(F_o^2)^2 ]^{1/2} = 0.1842$$

The standard deviation of an observation of unit weight<sup>4</sup> was 1.07. A Sheldrick weighting scheme was used. The maximum and minimum peaks on the final difference Fourier map corresponded to 1.04 and -1.70 e<sup>-</sup>/Å<sup>3</sup>, respectively.

Neutral atom scattering factors were taken from Cromer and Waber<sup>5</sup>. Anomalous dispersion effects were included in  $F_{\text{calc}}$ <sup>6</sup>; the values for  $\Delta f'$  and  $\Delta f''$  were those of Creagh and McAuley<sup>7</sup>. The values for the mass attenuation coefficients are those of Creagh and Hubbell<sup>8</sup>. All calculations were performed using the CrystalStructure<sup>9</sup> crystallographic software package except for refinement, which was performed using SHELXL-97<sup>10</sup>.

### References

(1) SIR92: Altomare, A., Cascarano, G., Giacovazzo, C., Guagliardi, A., Burla, M., Polidori, G., and Camalli, M. (1994) J. Appl. Cryst., 27, 435.

(2) DIRDIF99: Beurskens, P.T., Admiraal, G., Beurskens, G., Bosman, W.P., de Gelder, R., Israel, R. and Smits, J.M.M.(1999). The DIRDIF-99 program system, Technical Report of the Crystallography Laboratory, University of Nijmegen, The Netherlands.

(3) Least Squares function minimized: (SHELXL97)

$$\sum w(F_o^2 - F_c^2)^2 \quad \text{where } w = \text{Least Squares weights.}$$

(4) Standard deviation of an observation of unit weight:

$$[\sum w(F_o^2 - F_c^2)^2 / (N_o - N_v)]^{1/2}$$

where:  $N_o$  = number of observations  
 $N_v$  = number of variables

(5) Cromer, D. T. & Waber, J. T.; "International Tables for X-ray Crystallography", Vol. IV, The Kynoch Press, Birmingham, England, Table 2.2 A (1974).

(6) Ibers, J. A. & Hamilton, W. C.; Acta Crystallogr., 17, 781 (1964).

(7) Creagh, D. C. & McAuley, W.J. ; "International Tables for Crystallography", Vol C, (A.J.C. Wilson, ed.), Kluwer Academic Publishers, Boston, Table 4.2.6.8, pages 219-222 (1992).

(8) Creagh, D. C. & Hubbell, J.H.; "International Tables for Crystallography", Vol C, (A.J.C. Wilson, ed.), Kluwer Academic Publishers, Boston, Table 4.2.4.3, pages 200-206 (1992).

(9) CrystalStructure 3.8: Crystal Structure Analysis Package, Rigaku and Rigaku Americas (2000-2007). 9009 New Trails Dr. The Woodlands TX 77381 USA.

(10) SHELX97: Sheldrick, G.M. (1997).

## EXPERIMENTAL DETAILS

### A. Crystal Data

|                      |                                                                                                                 |
|----------------------|-----------------------------------------------------------------------------------------------------------------|
| Empirical Formula    | C <sub>16</sub> H <sub>10</sub> BCl <sub>4</sub> F <sub>5</sub> N <sub>6</sub> O <sub>7</sub> Ti                |
| Formula Weight       | 597.81                                                                                                          |
| Crystal Color, Habit | red, block                                                                                                      |
| Crystal Dimensions   | 0.40 X 0.20 X 0.12 mm                                                                                           |
| Crystal System       | monoclinic                                                                                                      |
| Lattice Type         | Primitive                                                                                                       |
| Indexing Images      | 3 oscillations @ 200.0 seconds                                                                                  |
| Detector Position    | 127.40 mm                                                                                                       |
| Pixel Size           | 0.100 mm                                                                                                        |
| Lattice Parameters   | a = 11.5340(4) Å<br>b = 12.9265(4) Å<br>c = 15.6367(7) Å<br>β = 98.7577(12) °<br>V = 2304.15(15) Å <sup>3</sup> |
| Space Group          | P2 <sub>1</sub> /c (#14)                                                                                        |
| Z value              | 4                                                                                                               |
| D <sub>calc</sub>    | 1.723 g/cm <sup>3</sup>                                                                                         |
| F <sub>000</sub>     | 1184.00                                                                                                         |
| μ(MoKα)              | 8.980 cm <sup>-1</sup>                                                                                          |

## B. Intensity Measurements

|                                                           |                                                                       |
|-----------------------------------------------------------|-----------------------------------------------------------------------|
| Diffractometer                                            | Rigaku RAXIS-RAPID                                                    |
| Radiation                                                 | MoK $\alpha$ ( $\lambda$ = 0.71075 Å)<br>graphite monochromated       |
| Detector Aperture                                         | 280 mm x 256 mm                                                       |
| Data Images                                               | 74 exposures                                                          |
| $\omega$ oscillation Range ( $\chi=45.0$ , $\phi=0.0$ )   | 130.0 - 190.0 $^\circ$                                                |
| Exposure Rate                                             | 280.0 sec./ $^\circ$                                                  |
| $\omega$ oscillation Range ( $\chi=45.0$ , $\phi=180.0$ ) | 0.0 - 162.0 $^\circ$                                                  |
| Exposure Rate                                             | 280.0 sec./ $^\circ$                                                  |
| Detector Position                                         | 127.40 mm                                                             |
| Pixel Size                                                | 0.100 mm                                                              |
| $2\theta_{\max}$                                          | 50.6 $^\circ$                                                         |
| No. of Reflections Measured                               | Total: 18147<br>Unique: 4185 ( $R_{\text{int}} = 0.021$ )             |
| Corrections                                               | Lorentz-polarization<br>Absorption<br>(trans. factors: 0.718 - 0.898) |

### C. Structure Solution and Refinement

|                                       |                                                                                                                      |
|---------------------------------------|----------------------------------------------------------------------------------------------------------------------|
| Structure Solution                    | Direct Methods (SIR92)                                                                                               |
| Refinement                            | Full-matrix least-squares on $F^2$                                                                                   |
| Function Minimized                    | $\sum w (F_o^2 - F_c^2)^2$                                                                                           |
| Least Squares Weights                 | $w = 1 / [ \sigma^2(F_o^2) + (0.1048 \cdot P)^2 + 6.5259 \cdot P ]$<br>where $P = (\text{Max}(F_o^2, 0) + 2F_c^2)/3$ |
| $2\theta_{\text{max}}$ cutoff         | 50.6°                                                                                                                |
| Anomalous Dispersion                  | All non-hydrogen atoms                                                                                               |
| No. Observations (All reflections)    | 4185                                                                                                                 |
| No. Variables                         | 326                                                                                                                  |
| Reflection/Parameter Ratio            | 12.84                                                                                                                |
| Residuals: R1 ( $I > 2.00\sigma(I)$ ) | 0.0624                                                                                                               |
| Residuals: R (All reflections)        | 0.0660                                                                                                               |
| Residuals: wR2 (All reflections)      | 0.1842                                                                                                               |
| Goodness of Fit Indicator             | 1.067                                                                                                                |
| Max Shift/Error in Final Cycle        | 0.000                                                                                                                |
| Maximum peak in Final Diff. Map       | 1.04 e <sup>-</sup> /Å <sup>3</sup>                                                                                  |
| Minimum peak in Final Diff. Map       | -1.70 e <sup>-</sup> /Å <sup>3</sup>                                                                                 |



Table 1. Atomic coordinates and  $B_{\text{iso}}/B_{\text{eq}}$  and occupancy

| atom  | x           | y          | z           | $B_{\text{eq}}$ | occ |
|-------|-------------|------------|-------------|-----------------|-----|
| Ti(1) | 0.26783(6)  | 0.20009(5) | 0.68940(4)  | 1.941(18)       |     |
| Cl(1) | 0.22698(9)  | 0.04087(8) | 0.73886(7)  | 2.75(2)         |     |
| Cl(2) | 0.18584(9)  | 0.18311(9) | 0.54876(7)  | 3.04(2)         |     |
| Cl(3) | -0.0333(4)  | 0.4724(3)  | 0.6099(2)   | 7.19(9)         | 1/2 |
| Cl(4) | -0.2024(5)  | 0.3265(3)  | 0.5849(2)   | 16.42(17)       |     |
| Cl(5) | -0.0308(8)  | 0.4466(6)  | 0.5000(5)   | 13.7(2)         | 1/2 |
| F(1)  | 0.1764(2)   | 0.4513(2)  | 0.81124(19) | 3.50(5)         |     |
| F(2)  | 0.0224(2)   | 0.5160(2)  | 0.91350(19) | 4.02(5)         |     |
| F(3)  | -0.1641(2)  | 0.3921(2)  | 0.93774(18) | 4.17(5)         |     |
| F(4)  | -0.1931(2)  | 0.2073(2)  | 0.85613(19) | 3.74(5)         |     |
| F(5)  | -0.0419(2)  | 0.1439(2)  | 0.7512(2)   | 3.79(5)         |     |
| O(1)  | 0.1478(2)   | 0.2650(2)  | 0.7282(2)   | 2.78(5)         |     |
| N(1)  | 0.5386(2)   | 0.1811(2)  | 0.6850(2)   | 1.96(5)         |     |
| N(2)  | 0.4310(2)   | 0.1361(2)  | 0.6601(2)   | 1.96(5)         |     |
| N(3)  | 0.4917(2)   | 0.2640(2)  | 0.8186(2)   | 2.07(5)         |     |
| N(4)  | 0.3790(2)   | 0.2294(2)  | 0.8118(2)   | 2.25(5)         |     |
| N(5)  | 0.4655(2)   | 0.3627(2)  | 0.6805(2)   | 2.08(5)         |     |
| N(6)  | 0.3486(2)   | 0.3409(2)  | 0.6577(2)   | 2.26(5)         |     |
| C(1)  | 0.6219(3)   | 0.1205(3)  | 0.6606(2)   | 2.56(6)         |     |
| C(2)  | 0.5692(3)   | 0.0349(3)  | 0.6182(2)   | 2.85(7)         |     |
| C(3)  | 0.4509(3)   | 0.0482(3)  | 0.6193(2)   | 2.50(6)         |     |
| C(4)  | 0.5364(3)   | 0.2737(3)  | 0.9029(2)   | 2.41(6)         |     |
| C(5)  | 0.4529(4)   | 0.2450(3)  | 0.9522(2)   | 2.87(7)         |     |
| C(6)  | 0.3557(4)   | 0.2181(3)  | 0.8930(2)   | 2.74(7)         |     |
| C(7)  | 0.4886(4)   | 0.4564(3)  | 0.6503(2)   | 2.85(7)         |     |
| C(8)  | 0.3847(4)   | 0.4969(3)  | 0.6058(3)   | 3.69(9)         |     |
| C(9)  | 0.3011(4)   | 0.4230(3)  | 0.6122(3)   | 3.20(8)         |     |
| C(10) | 0.0728(3)   | 0.2957(3)  | 0.7802(2)   | 2.34(6)         |     |
| C(11) | 0.0855(3)   | 0.3904(3)  | 0.8225(2)   | 2.49(6)         |     |
| C(12) | 0.0071(3)   | 0.4235(3)  | 0.8756(2)   | 2.75(7)         |     |
| C(13) | -0.0855(3)  | 0.3617(3)  | 0.8872(2)   | 2.88(7)         |     |
| C(14) | -0.1010(3)  | 0.2673(3)  | 0.8457(2)   | 2.75(7)         |     |
| C(15) | -0.0234(3)  | 0.2344(3)  | 0.7928(2)   | 2.51(6)         |     |
| C(16) | -0.0723(16) | 0.3573(14) | 0.5548(10)  | 9.1(6)          | 1/2 |
| C(17) | -0.1002(8)  | 0.4339(8)  | 0.5818(6)   | 3.7(2)          | 1/2 |
| B(1)  | 0.5453(3)   | 0.2841(3)  | 0.7355(2)   | 1.99(6)         |     |

$$B_{\text{eq}} = 8/3 \pi^2 (U_{11}(\text{aa}^*)^2 + U_{22}(\text{bb}^*)^2 + U_{33}(\text{cc}^*)^2 + 2U_{12}(\text{aa}^*\text{bb}^*)\cos \gamma + 2U_{13}(\text{aa}^*\text{cc}^*)\cos \beta + 2U_{23}(\text{bb}^*\text{cc}^*)\cos \alpha)$$

Table 2. Atomic coordinates and  $B_{\text{iso}}$  involving hydrogens/ $B_{\text{eq}}$  and occupancy

| atom  | x      | y       | z      | $B_{\text{eq}}$ | occ |
|-------|--------|---------|--------|-----------------|-----|
| H(1)  | 0.7038 | 0.1341  | 0.6707 | 3.07            |     |
| H(2)  | 0.6064 | -0.0209 | 0.5936 | 3.42            |     |
| H(3)  | 0.3916 | 0.0015  | 0.5946 | 2.99            |     |
| H(4)  | 0.6134 | 0.2968  | 0.9248 | 2.89            |     |
| H(5)  | 0.4602 | 0.2439  | 1.0135 | 3.45            |     |
| H(6)  | 0.2830 | 0.1950  | 0.9076 | 3.28            |     |
| H(7)  | 0.5631 | 0.4895  | 0.6580 | 3.41            |     |
| H(8)  | 0.3740 | 0.5617  | 0.5771 | 4.43            |     |
| H(9)  | 0.2207 | 0.4290  | 0.5879 | 3.84            |     |
| H(10) | 0.6278 | 0.3098  | 0.7491 | 2.39            |     |

$$B_{\text{eq}} = 8/3 \pi^2 (U_{11}(aa^*)^2 + U_{22}(bb^*)^2 + U_{33}(cc^*)^2 + 2U_{12}(aa^*bb^*)\cos \gamma + 2U_{13}(aa^*cc^*)\cos \beta + 2U_{23}(bb^*cc^*)\cos \alpha)$$

Table 3. Anisotropic displacement parameters

| atom  | U <sub>11</sub> | U <sub>22</sub> | U <sub>33</sub> | U <sub>12</sub> | U <sub>13</sub> | U <sub>23</sub> |
|-------|-----------------|-----------------|-----------------|-----------------|-----------------|-----------------|
| Ti(1) | 0.0207(3)       | 0.0239(3)       | 0.0295(4)       | -0.0011(2)      | 0.0049(2)       | 0.0008(2)       |
| Cl(1) | 0.0317(5)       | 0.0300(5)       | 0.0427(5)       | -0.0066(3)      | 0.0052(4)       | 0.0059(3)       |
| Cl(2) | 0.0340(5)       | 0.0464(6)       | 0.0329(5)       | -0.0100(4)      | -0.0020(4)      | 0.0029(4)       |
| Cl(3) | 0.111(3)        | 0.092(2)        | 0.077(2)        | -0.006(2)       | 0.038(2)        | -0.004(2)       |
| Cl(4) | 0.337(7)        | 0.153(3)        | 0.135(2)        | -0.005(4)       | 0.042(3)        | 0.010(2)        |
| Cl(5) | 0.203(8)        | 0.152(6)        | 0.168(6)        | -0.022(5)       | 0.039(5)        | -0.006(5)       |
| F(1)  | 0.0341(13)      | 0.0347(13)      | 0.0643(17)      | -0.0077(10)     | 0.0074(12)      | -0.0023(11)     |
| F(2)  | 0.0613(17)      | 0.0409(14)      | 0.0507(16)      | 0.0033(13)      | 0.0086(13)      | -0.0139(12)     |
| F(3)  | 0.0488(15)      | 0.0674(19)      | 0.0467(15)      | 0.0105(14)      | 0.0217(12)      | -0.0022(13)     |
| F(4)  | 0.0301(12)      | 0.0545(16)      | 0.0594(17)      | -0.0043(11)     | 0.0125(11)      | 0.0125(13)      |
| F(5)  | 0.0395(14)      | 0.0350(13)      | 0.0706(18)      | -0.0065(11)     | 0.0122(12)      | -0.0107(12)     |
| O(1)  | 0.0267(13)      | 0.0342(15)      | 0.0465(16)      | 0.0019(11)      | 0.0115(12)      | -0.0016(12)     |
| N(1)  | 0.0220(15)      | 0.0257(15)      | 0.0266(15)      | -0.0001(12)     | 0.0035(12)      | -0.0005(12)     |
| N(2)  | 0.0256(15)      | 0.0223(15)      | 0.0266(15)      | -0.0019(12)     | 0.0041(12)      | -0.0011(12)     |
| N(3)  | 0.0268(15)      | 0.0229(15)      | 0.0285(16)      | 0.0002(12)      | 0.0030(12)      | -0.0027(12)     |
| N(4)  | 0.0287(16)      | 0.0293(17)      | 0.0288(16)      | -0.0016(13)     | 0.0086(13)      | -0.0027(13)     |
| N(5)  | 0.0254(15)      | 0.0228(15)      | 0.0303(16)      | -0.0027(12)     | 0.0029(12)      | -0.0001(12)     |
| N(6)  | 0.0235(15)      | 0.0240(16)      | 0.0376(17)      | 0.0012(12)      | 0.0022(13)      | 0.0014(13)      |
| C(1)  | 0.0254(19)      | 0.035(2)        | 0.037(2)        | 0.0066(16)      | 0.0065(15)      | -0.0006(16)     |
| C(2)  | 0.038(2)        | 0.030(2)        | 0.042(2)        | 0.0075(17)      | 0.0109(18)      | -0.0066(17)     |
| C(3)  | 0.036(2)        | 0.0251(19)      | 0.033(2)        | -0.0017(16)     | 0.0032(16)      | -0.0043(15)     |
| C(4)  | 0.037(2)        | 0.0237(18)      | 0.0289(19)      | 0.0028(16)      | -0.0012(16)     | -0.0050(15)     |
| C(5)  | 0.050(2)        | 0.036(2)        | 0.0248(19)      | 0.0040(19)      | 0.0081(17)      | -0.0029(16)     |
| C(6)  | 0.041(2)        | 0.035(2)        | 0.031(2)        | -0.0003(18)     | 0.0138(17)      | -0.0006(16)     |
| C(7)  | 0.040(2)        | 0.026(2)        | 0.041(2)        | -0.0075(17)     | 0.0033(18)      | 0.0045(16)      |
| C(8)  | 0.049(2)        | 0.026(2)        | 0.061(3)        | -0.0045(19)     | -0.005(2)       | 0.013(2)        |
| C(9)  | 0.034(2)        | 0.029(2)        | 0.055(2)        | 0.0051(17)      | -0.0038(19)     | 0.0097(19)      |
| C(10) | 0.0216(18)      | 0.032(2)        | 0.035(2)        | 0.0056(15)      | 0.0034(15)      | 0.0045(15)      |
| C(11) | 0.0242(18)      | 0.030(2)        | 0.039(2)        | 0.0009(15)      | 0.0010(16)      | 0.0037(16)      |
| C(12) | 0.037(2)        | 0.033(2)        | 0.033(2)        | 0.0063(17)      | -0.0009(17)     | -0.0009(16)     |
| C(13) | 0.032(2)        | 0.047(2)        | 0.031(2)        | 0.0114(18)      | 0.0074(16)      | 0.0036(18)      |
| C(14) | 0.0245(19)      | 0.040(2)        | 0.039(2)        | 0.0025(17)      | 0.0044(16)      | 0.0118(18)      |
| C(15) | 0.0237(18)      | 0.029(2)        | 0.041(2)        | 0.0008(15)      | 0.0012(16)      | 0.0007(16)      |
| C(16) | 0.149(17)       | 0.133(16)       | 0.074(9)        | -0.090(14)      | 0.046(10)       | -0.034(10)      |
| C(17) | 0.045(5)        | 0.052(5)        | 0.041(5)        | -0.040(5)       | -0.006(4)       | -0.020(4)       |
| B(1)  | 0.0228(19)      | 0.0228(19)      | 0.030(2)        | -0.0018(16)     | 0.0038(16)      | -0.0008(16)     |

The general temperature factor expression:  $\exp(-2\pi^2(a^2U_{11}h^2 + b^2U_{22}k^2 + c^2U_{33}l^2 + 2a^*b^*U_{12}hk + 2a^*c^*U_{13}hl + 2b^*c^*U_{23}kl))$

Table 4. Bond lengths (Å)

| atom  | atom                 | distance   | atom  | atom                 | distance   |
|-------|----------------------|------------|-------|----------------------|------------|
| Ti(1) | Cl(1)                | 2.2731(12) | Ti(1) | Cl(2)                | 2.2683(11) |
| Ti(1) | O(1)                 | 1.801(3)   | Ti(1) | N(2)                 | 2.168(3)   |
| Ti(1) | N(4)                 | 2.168(3)   | Ti(1) | N(6)                 | 2.138(3)   |
| Cl(3) | Cl(5)                | 1.755(10)  | Cl(3) | Cl(5) <sup>(1)</sup> | 2.231(10)  |
| Cl(3) | C(16)                | 1.743(18)  | Cl(3) | C(17)                | 0.966(10)  |
| Cl(4) | C(16)                | 1.69(2)    | Cl(4) | C(17)                | 1.826(12)  |
| Cl(5) | Cl(5) <sup>(1)</sup> | 1.554(12)  | Cl(5) | C(16)                | 1.56(2)    |
| Cl(5) | C(17)                | 1.618(14)  | F(1)  | C(11)                | 1.343(4)   |
| F(2)  | C(12)                | 1.333(5)   | F(3)  | C(13)                | 1.348(5)   |
| F(4)  | C(14)                | 1.345(5)   | F(5)  | C(15)                | 1.338(5)   |
| O(1)  | C(10)                | 1.335(5)   | N(1)  | N(2)                 | 1.373(4)   |
| N(1)  | C(1)                 | 1.340(5)   | N(1)  | B(1)                 | 1.544(5)   |
| N(2)  | C(3)                 | 1.339(5)   | N(3)  | N(4)                 | 1.364(4)   |
| N(3)  | C(4)                 | 1.345(4)   | N(3)  | B(1)                 | 1.544(5)   |
| N(4)  | C(6)                 | 1.345(5)   | N(5)  | N(6)                 | 1.370(4)   |
| N(5)  | C(7)                 | 1.341(5)   | N(5)  | B(1)                 | 1.542(5)   |
| N(6)  | C(9)                 | 1.347(5)   | C(1)  | C(2)                 | 1.382(5)   |
| C(2)  | C(3)                 | 1.378(6)   | C(4)  | C(5)                 | 1.374(6)   |
| C(5)  | C(6)                 | 1.385(5)   | C(7)  | C(8)                 | 1.394(6)   |
| C(8)  | C(9)                 | 1.371(6)   | C(10) | C(11)                | 1.389(5)   |
| C(10) | C(15)                | 1.402(5)   | C(11) | C(12)                | 1.385(6)   |
| C(12) | C(13)                | 1.369(6)   | C(13) | C(14)                | 1.381(6)   |
| C(14) | C(15)                | 1.376(6)   | C(16) | C(17)                | 1.14(2)    |

Symmetry Operators:

(1) -X,-Y+1,-Z+1

Table 5. Bond lengths involving hydrogens (Å)

| atom | atom | distance | atom | atom  | distance |
|------|------|----------|------|-------|----------|
| C(1) | H(1) | 0.950    | C(2) | H(2)  | 0.950    |
| C(3) | H(3) | 0.950    | C(4) | H(4)  | 0.950    |
| C(5) | H(5) | 0.950    | C(6) | H(6)  | 0.950    |
| C(7) | H(7) | 0.950    | C(8) | H(8)  | 0.950    |
| C(9) | H(9) | 0.950    | B(1) | H(10) | 1.000    |

Table 6. Bond angles ( $^{\circ}$ )

| atom                | atom  | atom                | angle     | atom                | atom  | atom                | angle      |
|---------------------|-------|---------------------|-----------|---------------------|-------|---------------------|------------|
| Cl(1)               | Ti(1) | Cl(2)               | 99.49(4)  | Cl(1)               | Ti(1) | O(1)                | 95.59(10)  |
| Cl(1)               | Ti(1) | N(2)                | 87.61(9)  | Cl(1)               | Ti(1) | N(4)                | 89.03(9)   |
| Cl(1)               | Ti(1) | N(6)                | 166.00(9) | Cl(2)               | Ti(1) | O(1)                | 98.24(9)   |
| Cl(2)               | Ti(1) | N(2)                | 90.29(8)  | Cl(2)               | Ti(1) | N(4)                | 167.35(10) |
| Cl(2)               | Ti(1) | N(6)                | 89.41(9)  | O(1)                | Ti(1) | N(2)                | 170.25(12) |
| O(1)                | Ti(1) | N(4)                | 90.16(13) | O(1)                | Ti(1) | N(6)                | 93.78(13)  |
| N(2)                | Ti(1) | N(4)                | 80.67(12) | N(2)                | Ti(1) | N(6)                | 81.52(12)  |
| N(4)                | Ti(1) | N(6)                | 80.56(12) | Cl(5)               | Cl(3) | Cl(5) <sup>1)</sup> | 43.9(3)    |
| Cl(5)               | Cl(3) | C(16)               | 52.8(6)   | Cl(5)               | Cl(3) | C(17)               | 65.7(7)    |
| Cl(5) <sup>1)</sup> | Cl(3) | C(16)               | 96.4(6)   | Cl(5) <sup>1)</sup> | Cl(3) | C(17)               | 103.2(7)   |
| C(16)               | Cl(3) | C(17)               | 37.6(8)   | C(16)               | Cl(4) | C(17)               | 37.7(7)    |
| Cl(3)               | Cl(5) | Cl(3) <sup>1)</sup> | 136.1(4)  | Cl(3)               | Cl(5) | Cl(5) <sup>1)</sup> | 84.6(5)    |
| Cl(3)               | Cl(5) | C(16)               | 63.2(7)   | Cl(3)               | Cl(5) | C(17)               | 33.0(4)    |
| Cl(3) <sup>1)</sup> | Cl(5) | Cl(5) <sup>1)</sup> | 51.5(4)   | Cl(3) <sup>1)</sup> | Cl(5) | C(16)               | 159.7(8)   |
| Cl(3) <sup>1)</sup> | Cl(5) | C(17)               | 156.7(6)  | Cl(5) <sup>1)</sup> | Cl(5) | C(16)               | 146.9(9)   |
| Cl(5) <sup>1)</sup> | Cl(5) | C(17)               | 111.8(7)  | C(16)               | Cl(5) | C(17)               | 42.1(8)    |
| Ti(1)               | O(1)  | C(10)               | 161.2(2)  | N(2)                | N(1)  | C(1)                | 109.1(3)   |
| N(2)                | N(1)  | B(1)                | 118.9(3)  | C(1)                | N(1)  | B(1)                | 131.9(3)   |
| Ti(1)               | N(2)  | N(1)                | 123.7(2)  | Ti(1)               | N(2)  | C(3)                | 129.9(2)   |
| N(1)                | N(2)  | C(3)                | 106.4(3)  | N(4)                | N(3)  | C(4)                | 109.0(3)   |
| N(4)                | N(3)  | B(1)                | 119.2(2)  | C(4)                | N(3)  | B(1)                | 131.7(3)   |
| Ti(1)               | N(4)  | N(3)                | 123.7(2)  | Ti(1)               | N(4)  | C(6)                | 129.7(2)   |
| N(3)                | N(4)  | C(6)                | 106.6(3)  | N(6)                | N(5)  | C(7)                | 109.5(3)   |
| N(6)                | N(5)  | B(1)                | 119.3(3)  | C(7)                | N(5)  | B(1)                | 131.1(3)   |
| Ti(1)               | N(6)  | N(5)                | 124.1(2)  | Ti(1)               | N(6)  | C(9)                | 129.5(2)   |
| N(5)                | N(6)  | C(9)                | 106.3(3)  | N(1)                | C(1)  | C(2)                | 108.8(3)   |
| C(1)                | C(2)  | C(3)                | 104.9(3)  | N(2)                | C(3)  | C(2)                | 110.7(3)   |
| N(3)                | C(4)  | C(5)                | 109.1(3)  | C(4)                | C(5)  | C(6)                | 105.0(3)   |
| N(4)                | C(6)  | C(5)                | 110.3(3)  | N(5)                | C(7)  | C(8)                | 108.2(3)   |
| C(7)                | C(8)  | C(9)                | 105.3(4)  | N(6)                | C(9)  | C(8)                | 110.7(3)   |
| O(1)                | C(10) | C(11)               | 121.4(3)  | O(1)                | C(10) | C(15)               | 121.2(3)   |
| C(11)               | C(10) | C(15)               | 117.4(3)  | F(1)                | C(11) | C(10)               | 118.8(3)   |
| F(1)                | C(11) | C(12)               | 119.4(3)  | C(10)               | C(11) | C(12)               | 121.8(3)   |
| F(2)                | C(12) | C(11)               | 119.3(3)  | F(2)                | C(12) | C(13)               | 121.2(4)   |
| C(11)               | C(12) | C(13)               | 119.5(3)  | F(3)                | C(13) | C(12)               | 121.0(4)   |
| F(3)                | C(13) | C(14)               | 118.9(3)  | C(12)               | C(13) | C(14)               | 120.1(4)   |
| F(4)                | C(14) | C(13)               | 120.1(3)  | F(4)                | C(14) | C(15)               | 119.5(3)   |

Table 6. Bond angles ( $^{\circ}$ ) (continued)

| atom  | atom  | atom  | angle     | atom  | atom  | atom  | angle     |
|-------|-------|-------|-----------|-------|-------|-------|-----------|
| C(13) | C(14) | C(15) | 120.4(3)  | F(5)  | C(15) | C(10) | 119.8(3)  |
| F(5)  | C(15) | C(14) | 119.5(3)  | C(10) | C(15) | C(14) | 120.7(3)  |
| Cl(3) | C(16) | Cl(4) | 103.7(10) | Cl(3) | C(16) | Cl(5) | 64.0(7)   |
| Cl(3) | C(16) | C(17) | 31.1(7)   | Cl(4) | C(16) | Cl(5) | 133.6(12) |
| Cl(4) | C(16) | C(17) | 77.8(11)  | Cl(5) | C(16) | C(17) | 71.8(11)  |
| Cl(3) | C(17) | Cl(4) | 148.6(9)  | Cl(3) | C(17) | Cl(5) | 81.3(7)   |
| Cl(3) | C(17) | C(16) | 111.3(13) | Cl(4) | C(17) | Cl(5) | 119.8(6)  |
| Cl(4) | C(17) | C(16) | 64.6(10)  | Cl(5) | C(17) | C(16) | 66.1(11)  |
| N(1)  | B(1)  | N(3)  | 106.9(3)  | N(1)  | B(1)  | N(5)  | 107.7(2)  |
| N(3)  | B(1)  | N(5)  | 107.4(3)  |       |       |       |           |

Symmetry Operators:

(1)  $-X,-Y+1,-Z+1$

Table 7. Bond angles involving hydrogens ( $^{\circ}$ )

| atom | atom | atom  | angle | atom | atom | atom  | angle |
|------|------|-------|-------|------|------|-------|-------|
| N(1) | C(1) | H(1)  | 125.6 | C(2) | C(1) | H(1)  | 125.6 |
| C(1) | C(2) | H(2)  | 127.5 | C(3) | C(2) | H(2)  | 127.5 |
| N(2) | C(3) | H(3)  | 124.6 | C(2) | C(3) | H(3)  | 124.6 |
| N(3) | C(4) | H(4)  | 125.5 | C(5) | C(4) | H(4)  | 125.4 |
| C(4) | C(5) | H(5)  | 127.5 | C(6) | C(5) | H(5)  | 127.5 |
| N(4) | C(6) | H(6)  | 124.9 | C(5) | C(6) | H(6)  | 124.9 |
| N(5) | C(7) | H(7)  | 125.9 | C(8) | C(7) | H(7)  | 125.9 |
| C(7) | C(8) | H(8)  | 127.4 | C(9) | C(8) | H(8)  | 127.4 |
| N(6) | C(9) | H(9)  | 124.7 | C(8) | C(9) | H(9)  | 124.7 |
| N(1) | B(1) | H(10) | 111.5 | N(3) | B(1) | H(10) | 111.5 |
| N(5) | B(1) | H(10) | 111.5 |      |      |       |       |



Table 8. Torsion Angles(°)

| atom1               | atom2 | atom3               | atom4               | angle     | atom1               | atom2 | atom3               | atom4               | angle      |
|---------------------|-------|---------------------|---------------------|-----------|---------------------|-------|---------------------|---------------------|------------|
| Cl(1)               | Ti(1) | O(1)                | C(10)               | 47.4(8)   | Cl(1)               | Ti(1) | N(2)                | N(1)                | -130.1(2)  |
| Cl(1)               | Ti(1) | N(2)                | C(3)                | 47.3(3)   | Cl(1)               | Ti(1) | N(4)                | N(3)                | 129.1(2)   |
| Cl(1)               | Ti(1) | N(4)                | C(6)                | -50.5(3)  | Cl(1)               | Ti(1) | N(6)                | N(5)                | 0.3(6)     |
| Cl(1)               | Ti(1) | N(6)                | C(9)                | 178.9(3)  | Cl(2)               | Ti(1) | O(1)                | C(10)               | 147.8(8)   |
| Cl(2)               | Ti(1) | N(2)                | N(1)                | 130.4(2)  | Cl(2)               | Ti(1) | N(2)                | C(3)                | -52.2(3)   |
| Cl(2)               | Ti(1) | N(4)                | N(3)                | -3.5(6)   | Cl(2)               | Ti(1) | N(4)                | C(6)                | 176.9(3)   |
| Cl(2)               | Ti(1) | N(6)                | N(5)                | -129.5(2) | Cl(2)               | Ti(1) | N(6)                | C(9)                | 49.1(3)    |
| O(1)                | Ti(1) | N(2)                | N(1)                | -20.7(9)  | O(1)                | Ti(1) | N(2)                | C(3)                | 156.7(7)   |
| N(2)                | Ti(1) | O(1)                | C(10)               | -61.4(12) | O(1)                | Ti(1) | N(4)                | N(3)                | -135.3(2)  |
| O(1)                | Ti(1) | N(4)                | C(6)                | 45.1(3)   | N(4)                | Ti(1) | O(1)                | C(10)               | -41.7(8)   |
| O(1)                | Ti(1) | N(6)                | N(5)                | 132.3(3)  | O(1)                | Ti(1) | N(6)                | C(9)                | -49.2(4)   |
| N(6)                | Ti(1) | O(1)                | C(10)               | -122.2(8) | N(2)                | Ti(1) | N(4)                | N(3)                | 41.4(2)    |
| N(2)                | Ti(1) | N(4)                | C(6)                | -138.2(3) | N(4)                | Ti(1) | N(2)                | N(1)                | -40.7(2)   |
| N(4)                | Ti(1) | N(2)                | C(3)                | 136.7(3)  | N(2)                | Ti(1) | N(6)                | N(5)                | -39.1(2)   |
| N(2)                | Ti(1) | N(6)                | C(9)                | 139.4(4)  | N(6)                | Ti(1) | N(2)                | N(1)                | 41.1(2)    |
| N(6)                | Ti(1) | N(2)                | C(3)                | -141.6(3) | N(4)                | Ti(1) | N(6)                | N(5)                | 42.7(2)    |
| N(4)                | Ti(1) | N(6)                | C(9)                | -138.7(4) | N(6)                | Ti(1) | N(4)                | N(3)                | -41.5(2)   |
| N(6)                | Ti(1) | N(4)                | C(6)                | 138.9(3)  | Cl(5)               | Cl(3) | Cl(5) <sup>1)</sup> | C(16) <sup>1)</sup> | 160(2)     |
| Cl(5)               | Cl(3) | Cl(5) <sup>1)</sup> | C(17) <sup>1)</sup> | -49.8(15) | Cl(5) <sup>1)</sup> | Cl(3) | Cl(5)               | C(16)               | 172.3(9)   |
| Cl(5) <sup>1)</sup> | Cl(3) | Cl(5)               | C(17)               | -146.2(9) | Cl(5)               | Cl(3) | C(16)               | Cl(4)               | -132.1(11) |
| Cl(5)               | Cl(3) | C(16)               | C(17)               | -97.9(13) | C(16)               | Cl(3) | Cl(5)               | Cl(3) <sup>1)</sup> | -172.3(11) |
| C(16)               | Cl(3) | Cl(5)               | C(17)               | 41.5(10)  | C(16)               | Cl(3) | Cl(5)               | Cl(5) <sup>1)</sup> | -172.3(9)  |
| Cl(5)               | Cl(3) | C(17)               | Cl(4)               | 136(2)    | Cl(5)               | Cl(3) | C(17)               | C(16)               | 60.0(12)   |
| C(17)               | Cl(3) | Cl(5)               | Cl(3) <sup>1)</sup> | 146.2(10) | C(17)               | Cl(3) | Cl(5)               | C(16)               | -41.5(10)  |
| C(17)               | Cl(3) | Cl(5)               | Cl(5) <sup>1)</sup> | 146.2(9)  | Cl(5) <sup>1)</sup> | Cl(3) | C(16)               | Cl(4)               | -137.5(7)  |
| Cl(5) <sup>1)</sup> | Cl(3) | C(16)               | Cl(5)               | -5.4(6)   | Cl(5) <sup>1)</sup> | Cl(3) | C(16)               | C(17)               | -103.3(12) |
| C(16)               | Cl(3) | Cl(5) <sup>1)</sup> | Cl(3) <sup>1)</sup> | 6.2(9)    | C(16)               | Cl(3) | Cl(5) <sup>1)</sup> | C(16) <sup>1)</sup> | 166(2)     |
| C(16)               | Cl(3) | Cl(5) <sup>1)</sup> | C(17) <sup>1)</sup> | -43.7(17) | C(16)               | Cl(3) | Cl(5) <sup>1)</sup> | Cl(5)               | 6.2(7)     |
| Cl(5) <sup>1)</sup> | Cl(3) | C(17)               | Cl(4)               | 159.1(16) | Cl(5) <sup>1)</sup> | Cl(3) | C(17)               | Cl(5)               | 23.3(5)    |
| Cl(5) <sup>1)</sup> | Cl(3) | C(17)               | C(16)               | 83.3(12)  | C(17)               | Cl(3) | Cl(5) <sup>1)</sup> | Cl(3) <sup>1)</sup> | -31.4(10)  |
| C(17)               | Cl(3) | Cl(5) <sup>1)</sup> | C(16) <sup>1)</sup> | 128(2)    | C(17)               | Cl(3) | Cl(5) <sup>1)</sup> | C(17) <sup>1)</sup> | -81.2(17)  |
| C(17)               | Cl(3) | Cl(5) <sup>1)</sup> | Cl(5)               | -31.4(8)  | C(16)               | Cl(3) | C(17)               | Cl(4)               | 76(2)      |
| C(16)               | Cl(3) | C(17)               | Cl(5)               | -60.0(12) | C(17)               | Cl(3) | C(16)               | Cl(4)               | -34.2(11)  |
| C(17)               | Cl(3) | C(16)               | Cl(5)               | 97.9(13)  | C(16)               | Cl(4) | C(17)               | Cl(3)               | -90(2)     |
| C(16)               | Cl(4) | C(17)               | Cl(5)               | 37.8(10)  | C(17)               | Cl(4) | C(16)               | Cl(3)               | 17.3(5)    |
| C(17)               | Cl(4) | C(16)               | Cl(5)               | -49.7(13) | Cl(3)               | Cl(5) | Cl(5) <sup>1)</sup> | C(16) <sup>1)</sup> | -167.3(17) |
| Cl(3)               | Cl(5) | Cl(5) <sup>1)</sup> | C(17) <sup>1)</sup> | 161.0(6)  | Cl(3)               | Cl(5) | C(16)               | Cl(4)               | 84.2(15)   |

Table 8. Torsion angles ( $^{\circ}$ ) (continued)

| atom1              | atom2 | atom3              | atom4              | angle      | atom1              | atom2 | atom3              | atom4              | angle      |
|--------------------|-------|--------------------|--------------------|------------|--------------------|-------|--------------------|--------------------|------------|
| Cl(3)              | Cl(5) | C(16)              | C(17)              | 32.6(6)    | Cl(3)              | Cl(5) | C(17)              | Cl(4)              | -155.3(11) |
| Cl(3)              | Cl(5) | C(17)              | C(16)              | -118.0(12) | Cl(3) <sup>1</sup> | Cl(5) | Cl(5) <sup>1</sup> | C(16) <sup>1</sup> | 12.7(16)   |
| Cl(3) <sup>1</sup> | Cl(5) | Cl(5) <sup>1</sup> | C(17) <sup>1</sup> | -19.0(4)   | Cl(3) <sup>1</sup> | Cl(5) | C(16)              | Cl(3)              | 164(2)     |
| Cl(3) <sup>1</sup> | Cl(5) | C(16)              | Cl(4)              | -111(2)    | Cl(3) <sup>1</sup> | Cl(5) | C(16)              | C(17)              | -163(2)    |
| Cl(3) <sup>1</sup> | Cl(5) | C(17)              | Cl(3)              | -76.7(16)  | Cl(3) <sup>1</sup> | Cl(5) | C(17)              | Cl(4)              | 128.0(13)  |
| Cl(3) <sup>1</sup> | Cl(5) | C(17)              | C(16)              | 165.2(17)  | Cl(5) <sup>1</sup> | Cl(5) | C(16)              | Cl(3)              | 14.2(18)   |
| Cl(5) <sup>1</sup> | Cl(5) | C(16)              | Cl(4)              | 98(2)      | Cl(5) <sup>1</sup> | Cl(5) | C(16)              | C(17)              | 47(2)      |
| C(16)              | Cl(5) | Cl(5) <sup>1</sup> | Cl(3)              | -12.7(16)  | C(16)              | Cl(5) | Cl(5) <sup>1</sup> | Cl(3) <sup>1</sup> | 167.3(17)  |
| C(16)              | Cl(5) | Cl(5) <sup>1</sup> | C(17) <sup>1</sup> | 148.3(17)  | Cl(5) <sup>1</sup> | Cl(5) | C(17)              | Cl(3)              | -36.6(9)   |
| Cl(5) <sup>1</sup> | Cl(5) | C(17)              | Cl(4)              | 168.1(6)   | Cl(5) <sup>1</sup> | Cl(5) | C(17)              | C(16)              | -154.7(11) |
| C(17)              | Cl(5) | Cl(5) <sup>1</sup> | Cl(3)              | 19.0(4)    | C(17)              | Cl(5) | Cl(5) <sup>1</sup> | Cl(3) <sup>1</sup> | -161.0(6)  |
| C(17)              | Cl(5) | Cl(5) <sup>1</sup> | C(16) <sup>1</sup> | -148.3(17) | C(16)              | Cl(5) | C(17)              | Cl(3)              | 118.0(12)  |
| C(16)              | Cl(5) | C(17)              | Cl(4)              | -37.2(10)  | C(17)              | Cl(5) | C(16)              | Cl(3)              | -32.6(6)   |
| C(17)              | Cl(5) | C(16)              | Cl(4)              | 51.7(13)   | Ti(1)              | O(1)  | C(10)              | C(11)              | 99.9(8)    |
| Ti(1)              | O(1)  | C(10)              | C(15)              | -81.5(8)   | N(2)               | N(1)  | C(1)               | C(2)               | 0.6(4)     |
| C(1)               | N(1)  | N(2)               | Ti(1)              | 177.1(2)   | C(1)               | N(1)  | N(2)               | C(3)               | -0.8(4)    |
| N(2)               | N(1)  | B(1)               | N(3)               | 58.9(3)    | N(2)               | N(1)  | B(1)               | N(5)               | -56.3(4)   |
| B(1)               | N(1)  | N(2)               | Ti(1)              | -1.1(4)    | B(1)               | N(1)  | N(2)               | C(3)               | -179.0(3)  |
| C(1)               | N(1)  | B(1)               | N(3)               | -118.9(4)  | C(1)               | N(1)  | B(1)               | N(5)               | 126.0(4)   |
| B(1)               | N(1)  | C(1)               | C(2)               | 178.5(3)   | Ti(1)              | N(2)  | C(3)               | C(2)               | -177.1(2)  |
| N(1)               | N(2)  | C(3)               | C(2)               | 0.6(4)     | N(4)               | N(3)  | C(4)               | C(5)               | 0.2(4)     |
| C(4)               | N(3)  | N(4)               | Ti(1)              | -179.7(2)  | C(4)               | N(3)  | N(4)               | C(6)               | -0.0(3)    |
| N(4)               | N(3)  | B(1)               | N(1)               | -58.4(3)   | N(4)               | N(3)  | B(1)               | N(5)               | 57.0(4)    |
| B(1)               | N(3)  | N(4)               | Ti(1)              | -0.0(3)    | B(1)               | N(3)  | N(4)               | C(6)               | 179.6(3)   |
| C(4)               | N(3)  | B(1)               | N(1)               | 121.2(4)   | C(4)               | N(3)  | B(1)               | N(5)               | -123.5(4)  |
| B(1)               | N(3)  | C(4)               | C(5)               | -179.4(3)  | Ti(1)              | N(4)  | C(6)               | C(5)               | 179.5(2)   |
| N(3)               | N(4)  | C(6)               | C(5)               | -0.2(3)    | N(6)               | N(5)  | C(7)               | C(8)               | -0.6(5)    |
| C(7)               | N(5)  | N(6)               | Ti(1)              | 179.4(2)   | C(7)               | N(5)  | N(6)               | C(9)               | 0.5(4)     |
| N(6)               | N(5)  | B(1)               | N(1)               | 58.8(4)    | N(6)               | N(5)  | B(1)               | N(3)               | -56.0(4)   |
| B(1)               | N(5)  | N(6)               | Ti(1)              | -2.4(4)    | B(1)               | N(5)  | N(6)               | C(9)               | 178.7(3)   |
| C(7)               | N(5)  | B(1)               | N(1)               | -123.4(4)  | C(7)               | N(5)  | B(1)               | N(3)               | 121.7(4)   |
| B(1)               | N(5)  | C(7)               | C(8)               | -178.5(4)  | Ti(1)              | N(6)  | C(9)               | C(8)               | -179.0(3)  |
| N(5)               | N(6)  | C(9)               | C(8)               | -0.2(4)    | N(1)               | C(1)  | C(2)               | C(3)               | -0.3(4)    |
| C(1)               | C(2)  | C(3)               | N(2)               | -0.2(4)    | N(3)               | C(4)  | C(5)               | C(6)               | -0.3(4)    |
| C(4)               | C(5)  | C(6)               | N(4)               | 0.3(4)     | N(5)               | C(7)  | C(8)               | C(9)               | 0.4(5)     |
| C(7)               | C(8)  | C(9)               | N(6)               | -0.1(4)    | O(1)               | C(10) | C(11)              | F(1)               | -0.8(5)    |
| O(1)               | C(10) | C(11)              | C(12)              | 179.1(3)   | O(1)               | C(10) | C(15)              | F(5)               | -0.9(5)    |

Table 8. Torsion angles ( $^{\circ}$ ) (continued)

| atom1 | atom2 | atom3 | atom4 | angle     | atom1 | atom2 | atom3 | atom4 | angle     |
|-------|-------|-------|-------|-----------|-------|-------|-------|-------|-----------|
| O(1)  | C(10) | C(15) | C(14) | -179.2(3) | C(11) | C(10) | C(15) | F(5)  | 177.8(3)  |
| C(11) | C(10) | C(15) | C(14) | -0.5(5)   | C(15) | C(10) | C(11) | F(1)  | -179.5(3) |
| C(15) | C(10) | C(11) | C(12) | 0.4(5)    | F(1)  | C(11) | C(12) | F(2)  | 1.0(5)    |
| F(1)  | C(11) | C(12) | C(13) | -180.0(2) | C(10) | C(11) | C(12) | F(2)  | -178.9(3) |
| C(10) | C(11) | C(12) | C(13) | 0.1(4)    | F(2)  | C(12) | C(13) | F(3)  | -0.3(5)   |
| F(2)  | C(12) | C(13) | C(14) | 178.5(3)  | C(11) | C(12) | C(13) | F(3)  | -179.3(3) |
| C(11) | C(12) | C(13) | C(14) | -0.5(6)   | F(3)  | C(13) | C(14) | F(4)  | -0.1(4)   |
| F(3)  | C(13) | C(14) | C(15) | 179.1(3)  | C(12) | C(13) | C(14) | F(4)  | -179.0(3) |
| C(12) | C(13) | C(14) | C(15) | 0.3(6)    | F(4)  | C(14) | C(15) | F(5)  | 1.1(5)    |
| F(4)  | C(14) | C(15) | C(10) | 179.5(3)  | C(13) | C(14) | C(15) | F(5)  | -178.1(3) |
| C(13) | C(14) | C(15) | C(10) | 0.2(5)    | Cl(3) | C(16) | C(17) | Cl(4) | -146.0(9) |
| Cl(3) | C(16) | C(17) | Cl(5) | 69.5(10)  | Cl(4) | C(16) | C(17) | Cl(3) | 146.0(9)  |
| Cl(4) | C(16) | C(17) | Cl(5) | -144.5(8) | Cl(5) | C(16) | C(17) | Cl(3) | -69.5(10) |
| Cl(5) | C(16) | C(17) | Cl(4) | 144.5(8)  |       |       |       |       |           |

Symmetry Operators:

(1)  $-X,-Y+1,-Z+1$

The sign is positive if when looking from atom 2 to atom 3 a clock-wise motion of atom 1 would superimpose it on atom 4.

Table 9. Distances beyond the asymmetric unit out to 3.60 Å

| atom  | atom                | distance | atom  | atom                | distance  |
|-------|---------------------|----------|-------|---------------------|-----------|
| Cl(1) | F(2) <sup>1)</sup>  | 3.459(2) | Cl(1) | F(3) <sup>1)</sup>  | 3.352(3)  |
| Cl(1) | C(12) <sup>1)</sup> | 3.365(4) | Cl(1) | C(13) <sup>1)</sup> | 3.307(4)  |
| Cl(2) | F(2) <sup>1)</sup>  | 3.349(3) | Cl(2) | C(6) <sup>2)</sup>  | 3.585(4)  |
| Cl(2) | C(12) <sup>2)</sup> | 3.432(4) | Cl(3) | F(5) <sup>3)</sup>  | 3.133(5)  |
| Cl(3) | C(10)               | 3.580(5) | Cl(3) | C(11)               | 3.560(5)  |
| Cl(5) | F(4) <sup>2)</sup>  | 3.352(8) | F(1)  | F(5) <sup>3)</sup>  | 3.017(3)  |
| F(1)  | C(1) <sup>4)</sup>  | 3.175(4) | F(1)  | C(2) <sup>4)</sup>  | 3.164(4)  |
| F(2)  | Cl(1) <sup>3)</sup> | 3.459(2) | F(2)  | Cl(2) <sup>3)</sup> | 3.349(3)  |
| F(2)  | F(2) <sup>5)</sup>  | 2.860(4) | F(2)  | F(3) <sup>5)</sup>  | 2.887(3)  |
| F(2)  | F(5) <sup>3)</sup>  | 3.098(4) | F(2)  | C(12) <sup>5)</sup> | 3.456(5)  |
| F(2)  | C(13) <sup>5)</sup> | 3.471(5) | F(3)  | Cl(1) <sup>3)</sup> | 3.352(3)  |
| F(3)  | F(2) <sup>5)</sup>  | 2.887(3) | F(4)  | Cl(5) <sup>6)</sup> | 3.352(8)  |
| F(4)  | C(4) <sup>7)</sup>  | 3.420(5) | F(4)  | C(16) <sup>6)</sup> | 3.313(16) |
| F(4)  | B(1) <sup>7)</sup>  | 3.451(4) | F(5)  | Cl(3) <sup>1)</sup> | 3.133(5)  |
| F(5)  | F(1) <sup>1)</sup>  | 3.017(3) | F(5)  | F(2) <sup>1)</sup>  | 3.098(4)  |
| F(5)  | C(11) <sup>1)</sup> | 3.485(4) | F(5)  | C(12) <sup>1)</sup> | 3.529(5)  |
| C(1)  | F(1) <sup>8)</sup>  | 3.175(4) | C(2)  | F(1) <sup>8)</sup>  | 3.164(4)  |
| C(2)  | C(4) <sup>8)</sup>  | 3.587(5) | C(3)  | C(4) <sup>8)</sup>  | 3.570(5)  |
| C(4)  | F(4) <sup>9)</sup>  | 3.420(5) | C(4)  | C(2) <sup>4)</sup>  | 3.587(5)  |
| C(4)  | C(3) <sup>4)</sup>  | 3.570(5) | C(6)  | Cl(2) <sup>6)</sup> | 3.585(4)  |
| C(10) | Cl(3)               | 3.580(5) | C(11) | Cl(3)               | 3.560(5)  |
| C(11) | F(5) <sup>3)</sup>  | 3.485(4) | C(12) | Cl(1) <sup>3)</sup> | 3.365(4)  |
| C(12) | Cl(2) <sup>6)</sup> | 3.432(4) | C(12) | F(2) <sup>5)</sup>  | 3.456(5)  |
| C(12) | F(5) <sup>3)</sup>  | 3.529(5) | C(13) | Cl(1) <sup>3)</sup> | 3.307(4)  |
| C(13) | F(2) <sup>5)</sup>  | 3.471(5) | C(16) | F(4) <sup>2)</sup>  | 3.313(16) |
| B(1)  | F(4) <sup>9)</sup>  | 3.451(4) |       |                     |           |

Symmetry Operators:

- |                          |                           |
|--------------------------|---------------------------|
| (1) -X,Y+1/2,-1,-Z+1/2+1 | (2) X,-Y+1/2,Z+1/2-1      |
| (3) -X,Y+1/2,-Z+1/2+1    | (4) -X+1,Y+1/2,-Z+1/2+1   |
| (5) -X,-Y+1,-Z+2         | (6) X,-Y+1/2,Z+1/2        |
| (7) X-1,Y,Z              | (8) -X+1,Y+1/2-1,-Z+1/2+1 |
| (9) X+1,Y,Z              |                           |

Table 10. Distances beyond the asymmetric unit out to 3.60 Å involving hydrogens

| atom  | atom                 | distance | atom  | atom                | distance |
|-------|----------------------|----------|-------|---------------------|----------|
| Cl(1) | H(7) <sup>1)</sup>   | 2.778    | Cl(1) | H(10) <sup>1)</sup> | 3.416    |
| Cl(2) | H(5) <sup>2)</sup>   | 3.426    | Cl(2) | H(6) <sup>2)</sup>  | 3.060    |
| Cl(3) | H(9)                 | 3.053    | Cl(4) | H(1) <sup>3)</sup>  | 3.099    |
| Cl(4) | H(4) <sup>4)</sup>   | 3.421    | Cl(4) | H(8) <sup>5)</sup>  | 3.301    |
| Cl(4) | H(10) <sup>3)</sup>  | 3.465    | Cl(5) | H(9)                | 3.024    |
| Cl(5) | H(9) <sup>5)</sup>   | 2.891    | F(1)  | H(1) <sup>6)</sup>  | 2.730    |
| F(1)  | H(2) <sup>6)</sup>   | 2.736    | F(3)  | H(3) <sup>7)</sup>  | 2.955    |
| F(3)  | H(4) <sup>3)</sup>   | 2.826    | F(4)  | H(1) <sup>3)</sup>  | 3.108    |
| F(4)  | H(4) <sup>3)</sup>   | 2.863    | F(4)  | H(8) <sup>8)</sup>  | 3.106    |
| F(4)  | H(10) <sup>3)</sup>  | 2.787    | F(5)  | H(1) <sup>3)</sup>  | 3.013    |
| N(1)  | H(5) <sup>2)</sup>   | 2.866    | N(2)  | H(5) <sup>2)</sup>  | 2.829    |
| N(2)  | H(7) <sup>1)</sup>   | 3.410    | N(3)  | H(2) <sup>6)</sup>  | 3.371    |
| N(3)  | H(3) <sup>6)</sup>   | 3.538    | N(3)  | H(8) <sup>1)</sup>  | 3.336    |
| N(4)  | H(2) <sup>6)</sup>   | 3.544    | N(4)  | H(7) <sup>1)</sup>  | 3.192    |
| N(5)  | H(5) <sup>2)</sup>   | 2.945    | N(6)  | H(5) <sup>2)</sup>  | 2.970    |
| C(1)  | H(5) <sup>2)</sup>   | 3.247    | C(2)  | H(3) <sup>9)</sup>  | 3.458    |
| C(2)  | H(5) <sup>2)</sup>   | 3.437    | C(3)  | H(2) <sup>9)</sup>  | 3.314    |
| C(3)  | H(4) <sup>1)</sup>   | 3.382    | C(3)  | H(5) <sup>2)</sup>  | 3.166    |
| C(3)  | H(7) <sup>1)</sup>   | 3.591    | C(4)  | H(2) <sup>6)</sup>  | 3.129    |
| C(4)  | H(3) <sup>6)</sup>   | 3.057    | C(4)  | H(8) <sup>1)</sup>  | 2.929    |
| C(5)  | H(2) <sup>6)</sup>   | 3.160    | C(5)  | H(8) <sup>1)</sup>  | 3.176    |
| C(6)  | H(2) <sup>6)</sup>   | 3.404    | C(6)  | H(7) <sup>1)</sup>  | 3.237    |
| C(7)  | H(5) <sup>2)</sup>   | 3.343    | C(8)  | H(5) <sup>2)</sup>  | 3.592    |
| C(9)  | H(5) <sup>2)</sup>   | 3.356    | C(9)  | H(6) <sup>2)</sup>  | 3.522    |
| C(14) | H(10) <sup>3)</sup>  | 3.306    | C(16) | H(9)                | 3.466    |
| C(17) | H(9) <sup>5)</sup>   | 3.316    | B(1)  | H(5) <sup>2)</sup>  | 3.480    |
| H(1)  | Cl(4) <sup>10)</sup> | 3.099    | H(1)  | F(1) <sup>1)</sup>  | 2.730    |
| H(1)  | F(4) <sup>10)</sup>  | 3.108    | H(1)  | F(5) <sup>10)</sup> | 3.013    |
| H(2)  | F(1) <sup>1)</sup>   | 2.736    | H(2)  | N(3) <sup>1)</sup>  | 3.371    |
| H(2)  | N(4) <sup>1)</sup>   | 3.544    | H(2)  | C(3) <sup>9)</sup>  | 3.314    |
| H(2)  | C(4) <sup>1)</sup>   | 3.129    | H(2)  | C(5) <sup>1)</sup>  | 3.160    |
| H(2)  | C(6) <sup>1)</sup>   | 3.404    | H(2)  | H(2) <sup>9)</sup>  | 3.564    |
| H(2)  | H(3) <sup>9)</sup>   | 2.958    | H(2)  | H(4) <sup>1)</sup>  | 3.442    |
| H(2)  | H(5) <sup>1)</sup>   | 3.500    | H(3)  | F(3) <sup>8)</sup>  | 2.955    |
| H(3)  | N(3) <sup>1)</sup>   | 3.538    | H(3)  | C(2) <sup>9)</sup>  | 3.458    |
| H(3)  | C(4) <sup>1)</sup>   | 3.057    | H(3)  | H(2) <sup>9)</sup>  | 2.958    |
| H(3)  | H(4) <sup>1)</sup>   | 2.663    | H(3)  | H(10) <sup>1)</sup> | 3.511    |

Table 10. Distances beyond the asymmetric unit out to 3.60 Å involving hydrogens (continued)

| atom  | atom                 | distance | atom  | atom                 | distance |
|-------|----------------------|----------|-------|----------------------|----------|
| H(4)  | Cl(4) <sup>11)</sup> | 3.421    | H(4)  | F(3) <sup>10)</sup>  | 2.826    |
| H(4)  | F(4) <sup>10)</sup>  | 2.863    | H(4)  | C(3) <sup>6)</sup>   | 3.382    |
| H(4)  | H(2) <sup>6)</sup>   | 3.442    | H(4)  | H(3) <sup>6)</sup>   | 2.663    |
| H(4)  | H(8) <sup>1)</sup>   | 3.043    | H(5)  | Cl(2) <sup>12)</sup> | 3.426    |
| H(5)  | N(1) <sup>12)</sup>  | 2.866    | H(5)  | N(2) <sup>12)</sup>  | 2.829    |
| H(5)  | N(5) <sup>12)</sup>  | 2.945    | H(5)  | N(6) <sup>12)</sup>  | 2.970    |
| H(5)  | C(1) <sup>12)</sup>  | 3.247    | H(5)  | C(2) <sup>12)</sup>  | 3.437    |
| H(5)  | C(3) <sup>12)</sup>  | 3.166    | H(5)  | C(7) <sup>12)</sup>  | 3.343    |
| H(5)  | C(8) <sup>12)</sup>  | 3.592    | H(5)  | C(9) <sup>12)</sup>  | 3.356    |
| H(5)  | B(1) <sup>12)</sup>  | 3.480    | H(5)  | H(2) <sup>6)</sup>   | 3.500    |
| H(5)  | H(8) <sup>1)</sup>   | 3.469    | H(6)  | Cl(2) <sup>12)</sup> | 3.060    |
| H(6)  | C(9) <sup>12)</sup>  | 3.522    | H(6)  | H(7) <sup>1)</sup>   | 3.438    |
| H(6)  | H(9) <sup>12)</sup>  | 3.413    | H(7)  | Cl(1) <sup>6)</sup>  | 2.778    |
| H(7)  | N(2) <sup>6)</sup>   | 3.410    | H(7)  | N(4) <sup>6)</sup>   | 3.192    |
| H(7)  | C(3) <sup>6)</sup>   | 3.591    | H(7)  | C(6) <sup>6)</sup>   | 3.237    |
| H(7)  | H(6) <sup>6)</sup>   | 3.438    | H(8)  | Cl(4) <sup>5)</sup>  | 3.301    |
| H(8)  | F(4) <sup>7)</sup>   | 3.106    | H(8)  | N(3) <sup>6)</sup>   | 3.336    |
| H(8)  | C(4) <sup>6)</sup>   | 2.929    | H(8)  | C(5) <sup>6)</sup>   | 3.176    |
| H(8)  | H(4) <sup>6)</sup>   | 3.043    | H(8)  | H(5) <sup>6)</sup>   | 3.469    |
| H(9)  | Cl(3)                | 3.053    | H(9)  | Cl(5)                | 3.024    |
| H(9)  | Cl(5) <sup>5)</sup>  | 2.891    | H(9)  | C(16)                | 3.466    |
| H(9)  | C(17) <sup>5)</sup>  | 3.316    | H(9)  | H(6) <sup>2)</sup>   | 3.413    |
| H(10) | Cl(1) <sup>6)</sup>  | 3.416    | H(10) | Cl(4) <sup>10)</sup> | 3.465    |
| H(10) | F(4) <sup>10)</sup>  | 2.787    | H(10) | C(14) <sup>10)</sup> | 3.306    |
| H(10) | H(3) <sup>6)</sup>   | 3.511    |       |                      |          |

Symmetry Operators:

- |                               |                             |
|-------------------------------|-----------------------------|
| (1) $-X+1, Y+1/2-1, -Z+1/2+1$ | (2) $X, -Y+1/2, Z+1/2-1$    |
| (3) $X-1, Y, Z$               | (4) $X-1, -Y+1/2, Z+1/2-1$  |
| (5) $-X, -Y+1, -Z+1$          | (6) $-X+1, Y+1/2, -Z+1/2+1$ |
| (7) $-X, Y+1/2, -Z+1/2+1$     | (8) $-X, Y+1/2-1, -Z+1/2+1$ |
| (9) $-X+1, -Y, -Z+1$          | (10) $X+1, Y, Z$            |
| (11) $X+1, -Y+1/2, Z+1/2$     | (12) $X, -Y+1/2, Z+1/2$     |

X-ray Structure Report for  $\text{TpTiCl}_2(\text{O}-2,6\text{-Ph}_2\text{C}_6\text{H}_3)$  (**4**)

July 15, 2009

## *Experimental*

### Data Collection

A red block crystal of  $C_{27}H_{23}BCl_2N_6OTi$  having approximate dimensions of 0.35 x 0.32 x 0.25 mm was mounted on a glass fiber. All measurements were made on a Rigaku RAXIS RAPID imaging plate area detector with graphite monochromated Mo- $K\alpha$  radiation.

Indexing was performed from 3 oscillations that were exposed for 240 seconds. The crystal-to-detector distance was 127.40 mm.

Cell constants and an orientation matrix for data collection corresponded to a primitive orthorhombic cell with dimensions:

$$\begin{aligned} a &= 11.6472(3) \text{ \AA} \\ b &= 13.6516(3) \text{ \AA} \\ c &= 17.3088(5) \text{ \AA} \\ V &= 2752.14(12) \text{ \AA}^3 \end{aligned}$$

For  $Z = 4$  and F.W. = 577.13, the calculated density is 1.393 g/cm<sup>3</sup>. The systematic absences of:

$$\begin{aligned} h00: & h \pm 2n \\ 0k0: & k \pm 2n \\ 00l: & l \pm 2n \end{aligned}$$

uniquely determine the space group to be:

$$P2_12_12_1 \text{ (#19)}$$

The data were collected at a temperature of  $-80 \pm 1^\circ\text{C}$  to a maximum  $2\theta$  value of  $54.9^\circ$ . A total of 74 oscillation images were collected. A sweep of data was done using  $\omega$  scans from  $130.0$  to  $190.0^\circ$  in  $3.0^\circ$  step, at  $\chi=45.0^\circ$  and  $\phi = 0.0^\circ$ . The exposure rate was 200.0 [sec./ $^\circ$ ]. A second sweep was performed using  $\omega$  scans from  $0.0$  to  $162.0^\circ$  in  $3.0^\circ$  step, at  $\chi=45.0^\circ$  and  $\phi = 180.0^\circ$ . The exposure rate was 200.0 [sec./ $^\circ$ ]. The crystal-to-detector distance was 127.40 mm. Readout was performed in the 0.100 mm pixel mode.



### Data Reduction

Of the 27327 reflections that were collected, 6279 were unique ( $R_{\text{int}} = 0.014$ ); equivalent reflections were merged.

The linear absorption coefficient,  $\mu$ , for Mo-K $\alpha$  radiation is 5.372 cm<sup>-1</sup>. An empirical absorption correction was applied which resulted in transmission factors ranging from 0.746 to 0.874. The data were corrected for Lorentz and polarization effects.

### Structure Solution and Refinement

The structure was solved by direct methods<sup>1</sup> and expanded using Fourier techniques<sup>2</sup>. The non-hydrogen atoms were refined anisotropically. Hydrogen atoms were refined using the riding model. The final cycle of full-matrix least-squares refinement<sup>3</sup> on  $F^2$  was based on 6172 observed reflections and 367 variable parameters and converged (largest parameter shift was 0.00 times its esd) with unweighted and weighted agreement factors of:

$$R1 = \sum ||F_o| - |F_c|| / \sum |F_o| = 0.0195$$

$$wR2 = [ \sum ( w (F_o^2 - F_c^2)^2 ) / \sum w(F_o^2)^2 ]^{1/2} = 0.0609$$

The standard deviation of an observation of unit weight<sup>4</sup> was 1.00. A Sheldrick weighting scheme was used. Plots of  $\sum w (|F_o| - |F_c|)^2$  versus  $|F_o|$ , reflection order in data collection,  $\sin \theta/\lambda$  and various classes of indices showed no unusual trends. The maximum and minimum peaks on the final difference Fourier map corresponded to 0.35 and -0.36 e<sup>-</sup>/Å<sup>3</sup>, respectively. The absolute structure was deduced based on Flack parameter, -0.001(11), refined using 2761 Friedel pairs.<sup>5</sup>

Neutral atom scattering factors were taken from Cromer and Waber<sup>6</sup>. Anomalous dispersion effects were included in  $F_{\text{calc}}$ <sup>7</sup>; the values for  $\Delta f'$  and  $\Delta f''$  were those of Creagh and McAuley<sup>8</sup>. The values for the mass attenuation coefficients are those of Creagh and Hubbell<sup>9</sup>. All calculations were performed using the CrystalStructure<sup>10,11</sup> crystallographic software package.

### References

(1) SIR92: Altomare, A., Cascarano, G., Giacovazzo, C., Guagliardi, A., Burla, M., Polidori, G., and Camalli, M. (1994) *J. Appl. Cryst.*, 27, 435.

(2) DIRDIF99: Beurskens, P.T., Admiraal, G., Beurskens, G., Bosman, W.P., de Gelder, R., Israel, R. and Smits, J.M.M.(1999). The DIRDIF-99 program system, Technical Report of the Crystallography Laboratory, University of Nijmegen, The Netherlands.

(3) Least Squares function minimized:

$$\sum w(F_o^2 - F_c^2)^2 \quad \text{where } w = \text{Least Squares weights.}$$

(4) Standard deviation of an observation of unit weight:

$$[\sum w(F_o^2 - F_c^2)^2 / (N_o - N_v)]^{1/2}$$

where:  $N_o$  = number of observations  
 $N_v$  = number of variables

(5) Flack, H. D. (1983), *Acta Cryst.* A39, 876-881.

(6) Cromer, D. T. & Waber, J. T.; "International Tables for X-ray Crystallography", Vol. IV, The Kynoch Press, Birmingham, England, Table 2.2 A (1974).

(7) Ibers, J. A. & Hamilton, W. C.; *Acta Crystallogr.*, 17, 781 (1964).

(8) Creagh, D. C. & McAuley, W.J. ; "International Tables for Crystallography", Vol C, (A.J.C. Wilson, ed.), Kluwer Academic Publishers, Boston, Table 4.2.6.8, pages 219-222 (1992).

(9) Creagh, D. C. & Hubbell, J.H.; "International Tables for Crystallography", Vol C, (A.J.C. Wilson, ed.), Kluwer Academic Publishers, Boston, Table 4.2.4.3, pages 200-206 (1992).

(10) CrystalStructure 3.8: Crystal Structure Analysis Package, Rigaku and Rigaku Americas (2000-2007). 9009 New Trails Dr. The Woodlands TX 77381 USA.

(11) CRYSTALS Issue 11: Carruthers, J.R., Rollett, J.S., Betteridge, P.W., Kinna, D., Pearce, L., Larsen, A., and Gabe, E. Chemical Crystallography Laboratory, Oxford, UK. (1999)

## EXPERIMENTAL DETAILS

### A. Crystal Data

|                      |                                                                                            |
|----------------------|--------------------------------------------------------------------------------------------|
| Empirical Formula    | C <sub>27</sub> H <sub>23</sub> BCl <sub>2</sub> N <sub>6</sub> O <sub>7</sub> i           |
| Formula Weight       | 577.13                                                                                     |
| Crystal Color, Habit | red, block                                                                                 |
| Crystal Dimensions   | 0.35 X 0.32 X 0.25 mm                                                                      |
| Crystal System       | orthorhombic                                                                               |
| Lattice Type         | Primitive                                                                                  |
| Indexing Images      | 3 oscillations @ 240.0 seconds                                                             |
| Detector Position    | 127.40 mm                                                                                  |
| Pixel Size           | 0.100 mm                                                                                   |
| Lattice Parameters   | a = 11.6472(3) Å<br>b = 13.6516(3) Å<br>c = 17.3088(5) Å<br>V = 2752.14(12) Å <sup>3</sup> |
| Space Group          | P2 <sub>1</sub> 2 <sub>1</sub> 2 <sub>1</sub> (#19)                                        |
| Z value              | 4                                                                                          |
| D <sub>calc</sub>    | 1.393 g/cm <sup>3</sup>                                                                    |
| F <sub>000</sub>     | 1184.00                                                                                    |
| μ(MoKα)              | 5.372 cm <sup>-1</sup>                                                                     |

## B. Intensity Measurements

|                                                           |                                                                                  |
|-----------------------------------------------------------|----------------------------------------------------------------------------------|
| Diffractometer                                            | Rigaku RAXIS-RAPID                                                               |
| Radiation                                                 | MoK $\alpha$ ( $\lambda = 0.71075 \text{ \AA}$ )<br>graphite monochromated       |
| Detector Aperture                                         | 280 mm x 256 mm                                                                  |
| Data Images                                               | 74 exposures                                                                     |
| $\omega$ oscillation Range ( $\chi=45.0$ , $\phi=0.0$ )   | 130.0 - 190.0 $^\circ$                                                           |
| Exposure Rate                                             | 200.0 sec./ $^\circ$                                                             |
| $\omega$ oscillation Range ( $\chi=45.0$ , $\phi=180.0$ ) | 0.0 - 162.0 $^\circ$                                                             |
| Exposure Rate                                             | 200.0 sec./ $^\circ$                                                             |
| Detector Position                                         | 127.40 mm                                                                        |
| Pixel Size                                                | 0.100 mm                                                                         |
| $2\theta_{\max}$                                          | 54.9 $^\circ$                                                                    |
| No. of Reflections Measured                               | Total: 27327<br>Unique: 6279 ( $R_{\text{int}} = 0.014$ )<br>Friedel pairs: 2761 |
| Corrections                                               | Lorentz-polarization<br>Absorption<br>(trans. factors: 0.746 - 0.874)            |

### C. Structure Solution and Refinement

|                                          |                                                |
|------------------------------------------|------------------------------------------------|
| Structure Solution                       | Direct Methods (SIR92)                         |
| Refinement                               | Full-matrix least-squares on $F^2$             |
| Function Minimized                       | $\sum w (F_o^2 - F_c^2)^2$                     |
| Least Squares Weights                    | $1/[0.0006F_o^2+1.0000\sigma(F_o^2)]/(4F_o^2)$ |
| $2\theta_{\max}$ cutoff                  | 54.9°                                          |
| Anomalous Dispersion                     | All non-hydrogen atoms                         |
| No. Observations ( $I > 1.00\sigma(I)$ ) | 6172                                           |
| No. Variables                            | 367                                            |
| Reflection/Parameter Ratio               | 16.82                                          |
| Residuals: R1 ( $I > 2.00\sigma(I)$ )    | 0.0195                                         |
| Residuals: R ( $I > 1.00\sigma(I)$ )     | 0.0198                                         |
| Residuals: wR2 ( $I > 1.00\sigma(I)$ )   | 0.0609                                         |
| Goodness of Fit Indicator                | 1.003                                          |
| Flack Parameter (Friedel pairs = 2761)   | -0.001(11)                                     |
| Max Shift/Error in Final Cycle           | 0.000                                          |
| Maximum peak in Final Diff. Map          | 0.35 e <sup>-</sup> /Å <sup>3</sup>            |
| Minimum peak in Final Diff. Map          | -0.36 e <sup>-</sup> /Å <sup>3</sup>           |

Table 1. Atomic coordinates and  $B_{\text{iso}}/B_{\text{eq}}$

| atom  | x           | y            | z            | $B_{\text{eq}}$ |
|-------|-------------|--------------|--------------|-----------------|
| Ti(1) | 0.69446(2)  | 0.182220(10) | 0.279510(10) | 1.148(3)        |
| Cl(1) | 0.74621(3)  | 0.06013(2)   | 0.36176(2)   | 2.163(6)        |
| Cl(2) | 0.74821(2)  | 0.31026(2)   | 0.35783(2)   | 1.843(5)        |
| O(1)  | 0.81799(6)  | 0.17423(6)   | 0.21787(4)   | 1.429(13)       |
| N(1)  | 0.42510(8)  | 0.17553(8)   | 0.29786(6)   | 1.709(18)       |
| N(2)  | 0.52654(8)  | 0.17699(8)   | 0.33717(5)   | 1.452(17)       |
| N(3)  | 0.49820(10) | 0.08633(8)   | 0.18313(6)   | 1.88(2)         |
| N(4)  | 0.60826(9)  | 0.07646(7)   | 0.20830(6)   | 1.668(19)       |
| N(5)  | 0.49151(9)  | 0.26906(8)   | 0.18380(6)   | 1.757(19)       |
| N(6)  | 0.60048(9)  | 0.28481(7)   | 0.21018(6)   | 1.582(18)       |
| C(1)  | 0.33743(10) | 0.17596(10)  | 0.34796(8)   | 2.22(2)         |
| C(2)  | 0.38115(11) | 0.17821(10)  | 0.42225(7)   | 2.16(2)         |
| C(3)  | 0.49998(11) | 0.17801(9)   | 0.41254(6)   | 1.68(2)         |
| C(4)  | 0.46750(14) | 0.00567(10)  | 0.14354(8)   | 2.56(2)         |
| C(5)  | 0.55915(15) | -0.05794(10) | 0.14230(9)   | 2.81(2)         |
| C(6)  | 0.64520(14) | -0.01168(9)  | 0.18382(8)   | 2.20(2)         |
| C(7)  | 0.45400(13) | 0.34898(10)  | 0.14622(8)   | 2.34(2)         |
| C(8)  | 0.53887(14) | 0.41868(10)  | 0.14762(8)   | 2.47(2)         |
| C(9)  | 0.62930(12) | 0.37629(9)   | 0.18770(8)   | 2.08(2)         |
| C(10) | 0.89275(10) | 0.11890(8)   | 0.17559(7)   | 1.39(2)         |
| C(11) | 0.86968(10) | 0.10238(8)   | 0.09675(7)   | 1.54(2)         |
| C(12) | 0.93719(12) | 0.03397(9)   | 0.05769(7)   | 2.04(2)         |
| C(13) | 1.02837(13) | -0.01245(10) | 0.09378(8)   | 2.30(2)         |
| C(14) | 1.05496(12) | 0.00984(9)   | 0.16966(8)   | 2.09(2)         |
| C(15) | 0.98803(10) | 0.07560(8)   | 0.21245(7)   | 1.61(2)         |
| C(16) | 0.78177(10) | 0.15835(9)   | 0.05289(7)   | 1.65(2)         |
| C(17) | 0.70226(13) | 0.10985(10)  | 0.00605(8)   | 2.25(2)         |
| C(18) | 0.63045(13) | 0.16343(11)  | -0.04270(9)  | 2.92(2)         |
| C(19) | 0.63678(13) | 0.26451(12)  | -0.04498(9)  | 2.90(3)         |
| C(20) | 0.71349(14) | 0.31251(11)  | 0.00214(8)   | 2.81(2)         |
| C(21) | 0.78574(12) | 0.26024(10)  | 0.05084(8)   | 2.29(2)         |
| C(22) | 1.01961(10) | 0.09769(9)   | 0.29375(7)   | 1.59(2)         |
| C(23) | 1.05424(11) | 0.02227(10)  | 0.34328(8)   | 2.08(2)         |
| C(24) | 1.08417(13) | 0.04120(11)  | 0.41934(8)   | 2.43(2)         |
| C(25) | 1.08024(12) | 0.13631(11)  | 0.44766(8)   | 2.38(2)         |
| C(26) | 1.04740(12) | 0.21160(10)  | 0.39890(8)   | 2.24(2)         |
| C(27) | 1.01715(10) | 0.19320(10)  | 0.32264(7)   | 1.83(2)         |

Table 1. Atomic coordinates and  $B_{iso}/B_{eq}$  (continued)

| atom | x           | y           | z          | $B_{eq}$ |
|------|-------------|-------------|------------|----------|
| B(1) | 0.42693(11) | 0.17570(11) | 0.20839(8) | 1.89(2)  |

$$B_{eq} = 8/3 \pi^2 (U_{11}(aa^*)^2 + U_{22}(bb^*)^2 + U_{33}(cc^*)^2 + 2U_{12}(aa^*bb^*)\cos \gamma + 2U_{13}(aa^*cc^*)\cos \beta + 2U_{23}(bb^*cc^*)\cos \alpha)$$

Table 2. Atomic coordinates and  $B_{iso}$  involving hydrogens/ $B_{eq}$

| atom  | x      | y       | z       | $B_{eq}$ |
|-------|--------|---------|---------|----------|
| H(1)  | 0.3444 | 0.1764  | 0.1866  | 2.26     |
| H(2)  | 0.2558 | 0.1749  | 0.3342  | 2.69     |
| H(3)  | 0.3382 | 0.1795  | 0.4709  | 2.64     |
| H(4)  | 0.5561 | 0.1787  | 0.4547  | 2.03     |
| H(5)  | 0.3919 | -0.0060 | 0.1191  | 3.16     |
| H(6)  | 0.5628 | -0.1231 | 0.1173  | 3.38     |
| H(7)  | 0.7224 | -0.0392 | 0.1939  | 2.58     |
| H(8)  | 0.3778 | 0.3563  | 0.1216  | 2.82     |
| H(9)  | 0.5361 | 0.4851  | 0.1247  | 3.02     |
| H(10) | 0.7038 | 0.4085  | 0.1984  | 2.51     |
| H(11) | 0.9199 | 0.0186  | 0.0042  | 2.54     |
| H(12) | 1.0737 | -0.0604 | 0.0658  | 2.90     |
| H(13) | 1.1210 | -0.0208 | 0.1938  | 2.53     |
| H(14) | 0.6970 | 0.0397  | 0.0075  | 2.65     |
| H(15) | 0.5761 | 0.1298  | -0.0749 | 3.54     |
| H(16) | 0.5881 | 0.3009  | -0.0793 | 3.48     |
| H(17) | 0.7169 | 0.3828  | 0.0015  | 3.41     |
| H(18) | 0.8391 | 0.2947  | 0.0832  | 2.75     |
| H(19) | 1.0575 | -0.0431 | 0.3245  | 2.54     |
| H(20) | 1.1074 | -0.0109 | 0.4522  | 2.94     |
| H(21) | 1.0998 | 0.1494  | 0.4999  | 2.86     |
| H(22) | 1.0456 | 0.2769  | 0.4179  | 2.75     |
| H(23) | 0.9947 | 0.2457  | 0.2900  | 2.19     |

$$B_{eq} = 8/3 \pi^2 (U_{11}(aa^*)^2 + U_{22}(bb^*)^2 + U_{33}(cc^*)^2 + 2U_{12}(aa^*bb^*)\cos \gamma + 2U_{13}(aa^*cc^*)\cos \beta + 2U_{23}(bb^*cc^*)\cos \alpha)$$



Table 3. Anisotropic displacement parameters

| atom  | U <sub>11</sub> | U <sub>22</sub> | U <sub>33</sub> | U <sub>12</sub> | U <sub>13</sub> | U <sub>23</sub> |
|-------|-----------------|-----------------|-----------------|-----------------|-----------------|-----------------|
| Ti(1) | 0.01426(9)      | 0.01473(9)      | 0.01464(9)      | 0.00018(8)      | 0.00031(7)      | -0.00061(7)     |
| Cl(1) | 0.02499(15)     | 0.02713(15)     | 0.03005(16)     | 0.00267(12)     | -0.00173(13)    |                 |
|       | 0.01141(12)     |                 |                 |                 |                 |                 |
| Cl(2) | 0.02267(14)     | 0.02271(13)     | 0.02463(14)     | -0.00314(12)    | -0.00063(11)    |                 |
|       | -0.00745(11)    |                 |                 |                 |                 |                 |
| O(1)  | 0.0165(3)       | 0.0202(3)       | 0.0176(3)       | 0.0029(3)       | 0.0013(3)       | -0.0013(3)      |
| N(1)  | 0.0160(4)       | 0.0267(4)       | 0.0222(4)       | -0.0017(4)      | -0.0013(3)      | 0.0024(4)       |
| N(2)  | 0.0173(4)       | 0.0197(4)       | 0.0181(4)       | -0.0003(4)      | -0.0005(3)      | 0.0013(3)       |
| N(3)  | 0.0248(5)       | 0.0255(5)       | 0.0210(5)       | -0.0063(4)      | -0.0041(4)      | -0.0024(4)      |
| N(4)  | 0.0227(4)       | 0.0205(4)       | 0.0202(5)       | -0.0027(4)      | 0.0013(4)       | -0.0025(3)      |
| N(5)  | 0.0196(4)       | 0.0270(5)       | 0.0202(5)       | 0.0034(4)       | -0.0028(4)      | 0.0024(4)       |
| N(6)  | 0.0193(4)       | 0.0201(4)       | 0.0206(4)       | 0.0017(3)       | -0.0003(4)      | 0.0022(3)       |
| C(1)  | 0.0185(5)       | 0.0341(6)       | 0.0317(6)       | 0.0007(5)       | 0.0050(4)       | 0.0047(5)       |
| C(2)  | 0.0256(5)       | 0.0299(6)       | 0.0265(6)       | 0.0016(5)       | 0.0086(4)       | 0.0030(5)       |
| C(3)  | 0.0258(5)       | 0.0193(4)       | 0.0188(5)       | -0.0003(5)      | 0.0021(4)       | -0.0003(4)      |
| C(4)  | 0.0417(8)       | 0.0317(6)       | 0.0239(6)       | -0.0161(6)      | -0.0048(6)      | -0.0047(5)      |
| C(5)  | 0.0542(9)       | 0.0232(6)       | 0.0294(7)       | -0.0115(6)      | 0.0031(6)       | -0.0075(5)      |
| C(6)  | 0.0405(7)       | 0.0188(5)       | 0.0242(6)       | -0.0017(5)      | 0.0053(5)       | -0.0038(4)      |
| C(7)  | 0.0327(6)       | 0.0313(6)       | 0.0249(6)       | 0.0120(5)       | -0.0026(5)      | 0.0035(5)       |
| C(8)  | 0.0433(8)       | 0.0228(6)       | 0.0276(6)       | 0.0080(5)       | -0.0030(6)      | 0.0052(5)       |
| C(9)  | 0.0326(6)       | 0.0209(5)       | 0.0256(6)       | -0.0003(5)      | 0.0009(5)       | 0.0024(4)       |
| C(10) | 0.0172(5)       | 0.0173(5)       | 0.0184(5)       | -0.0004(4)      | 0.0030(4)       | -0.0022(4)      |
| C(11) | 0.0212(5)       | 0.0192(5)       | 0.0180(5)       | -0.0005(4)      | 0.0009(4)       | -0.0005(4)      |
| C(12) | 0.0345(6)       | 0.0240(5)       | 0.0192(5)       | 0.0030(5)       | 0.0023(5)       | -0.0050(4)      |
| C(13) | 0.0358(7)       | 0.0245(6)       | 0.0272(6)       | 0.0104(5)       | 0.0062(5)       | -0.0054(4)      |
| C(14) | 0.0255(6)       | 0.0253(5)       | 0.0288(6)       | 0.0088(5)       | 0.0014(5)       | -0.0005(5)      |
| C(15) | 0.0215(5)       | 0.0192(5)       | 0.0206(6)       | 0.0017(4)       | 0.0013(4)       | -0.0001(4)      |
| C(16) | 0.0219(5)       | 0.0256(5)       | 0.0151(4)       | 0.0027(4)       | 0.0008(4)       | -0.0013(4)      |
| C(17) | 0.0317(6)       | 0.0279(6)       | 0.0260(6)       | -0.0016(5)      | -0.0028(5)      | -0.0034(4)      |
| C(18) | 0.0333(6)       | 0.0433(8)       | 0.0344(7)       | -0.0020(6)      | -0.0138(6)      | -0.0051(6)      |
| C(19) | 0.0340(7)       | 0.0438(8)       | 0.0324(7)       | 0.0114(6)       | -0.0093(6)      | 0.0028(6)       |
| C(20) | 0.0438(7)       | 0.0281(6)       | 0.0347(7)       | 0.0067(6)       | -0.0086(6)      | 0.0028(5)       |
| C(21) | 0.0316(7)       | 0.0269(6)       | 0.0285(6)       | -0.0005(5)      | -0.0078(5)      | -0.0013(5)      |
| C(22) | 0.0155(5)       | 0.0255(5)       | 0.0195(5)       | 0.0027(4)       | 0.0019(4)       | -0.0012(4)      |
| C(23) | 0.0247(6)       | 0.0257(6)       | 0.0285(6)       | 0.0017(5)       | -0.0015(5)      | 0.0012(4)       |
| C(24) | 0.0302(6)       | 0.0363(6)       | 0.0260(6)       | 0.0024(5)       | -0.0027(5)      | 0.0070(5)       |
| C(25) | 0.0251(6)       | 0.0449(7)       | 0.0205(6)       | 0.0030(5)       | -0.0030(5)      | -0.0046(5)      |
| C(26) | 0.0255(6)       | 0.0321(6)       | 0.0276(6)       | 0.0034(5)       | -0.0009(5)      | -0.0084(5)      |
| C(27) | 0.0197(5)       | 0.0258(5)       | 0.0240(5)       | 0.0043(5)       | -0.0012(4)      | -0.0015(5)      |

Table 3. Anisotropic displacement parameters (continued)

| atom | U <sub>11</sub> | U <sub>22</sub> | U <sub>33</sub> | U <sub>12</sub> | U <sub>13</sub> | U <sub>23</sub> |
|------|-----------------|-----------------|-----------------|-----------------|-----------------|-----------------|
| B(1) | 0.0193(5)       | 0.0309(6)       | 0.0217(6)       | -0.0030(5)      | -0.0039(4)      | 0.0004(5)       |

The general temperature factor expression:  $\exp(-2\pi^2(a^2U_{11}h^2 + b^2U_{22}k^2 + c^2U_{33}l^2 + 2a^*b^*U_{12}hk + 2a^*c^*U_{13}hl + 2b^*c^*U_{23}kl))$

Table 4. Bond lengths (Å)

| atom  | atom  | distance   | atom  | atom  | distance   |
|-------|-------|------------|-------|-------|------------|
| Ti(1) | Cl(1) | 2.2733(3)  | Ti(1) | Cl(2) | 2.2989(3)  |
| Ti(1) | O(1)  | 1.7945(7)  | Ti(1) | N(2)  | 2.1969(9)  |
| Ti(1) | N(4)  | 2.1475(10) | Ti(1) | N(6)  | 2.1447(10) |
| O(1)  | C(10) | 1.3654(13) | N(1)  | N(2)  | 1.3635(13) |
| N(1)  | C(1)  | 1.3397(15) | N(1)  | B(1)  | 1.5488(17) |
| N(2)  | C(3)  | 1.3408(13) | N(3)  | N(4)  | 1.3606(15) |
| N(3)  | C(4)  | 1.3453(17) | N(3)  | B(1)  | 1.5391(18) |
| N(4)  | C(6)  | 1.3463(16) | N(5)  | N(6)  | 1.3659(14) |
| N(5)  | C(7)  | 1.3433(17) | N(5)  | B(1)  | 1.5399(18) |
| N(6)  | C(9)  | 1.3504(15) | C(1)  | C(2)  | 1.3834(18) |
| C(2)  | C(3)  | 1.3942(18) | C(4)  | C(5)  | 1.376(2)   |
| C(5)  | C(6)  | 1.386(2)   | C(7)  | C(8)  | 1.372(2)   |
| C(8)  | C(9)  | 1.388(2)   | C(10) | C(11) | 1.4090(17) |
| C(10) | C(15) | 1.4100(16) | C(11) | C(12) | 1.3955(17) |
| C(11) | C(16) | 1.4861(16) | C(12) | C(13) | 1.3855(19) |
| C(13) | C(14) | 1.3833(19) | C(14) | C(15) | 1.4008(17) |
| C(15) | C(22) | 1.4854(17) | C(16) | C(17) | 1.3976(18) |
| C(16) | C(21) | 1.3922(18) | C(17) | C(18) | 1.395(2)   |
| C(18) | C(19) | 1.382(2)   | C(19) | C(20) | 1.376(2)   |
| C(20) | C(21) | 1.388(2)   | C(22) | C(23) | 1.3992(18) |
| C(22) | C(27) | 1.3968(18) | C(23) | C(24) | 1.3862(19) |
| C(24) | C(25) | 1.389(2)   | C(25) | C(26) | 1.3838(19) |
| C(26) | C(27) | 1.3891(18) |       |       |            |

Table 5. Bond lengths involving hydrogens (Å)

| atom  | atom  | distance | atom  | atom  | distance |
|-------|-------|----------|-------|-------|----------|
| C(1)  | H(2)  | 0.980    | C(2)  | H(3)  | 0.980    |
| C(3)  | H(4)  | 0.980    | C(4)  | H(5)  | 0.990    |
| C(5)  | H(6)  | 0.990    | C(6)  | H(7)  | 0.990    |
| C(7)  | H(8)  | 0.990    | C(8)  | H(9)  | 0.990    |
| C(9)  | H(10) | 0.990    | C(12) | H(11) | 0.970    |
| C(13) | H(12) | 0.970    | C(14) | H(13) | 0.970    |
| C(17) | H(14) | 0.960    | C(18) | H(15) | 0.960    |
| C(19) | H(16) | 0.960    | C(20) | H(17) | 0.960    |
| C(21) | H(18) | 0.960    | C(23) | H(19) | 0.950    |
| C(24) | H(20) | 0.950    | C(25) | H(21) | 0.950    |
| C(26) | H(22) | 0.950    | C(27) | H(23) | 0.950    |
| B(1)  | H(1)  | 1.033    |       |       |          |

Table 6. Bond angles (°)

| atom  | atom  | atom  | angle      | atom  | atom  | atom  | angle      |
|-------|-------|-------|------------|-------|-------|-------|------------|
| Cl(1) | Ti(1) | Cl(2) | 96.660(13) | Cl(1) | Ti(1) | O(1)  | 96.61(2)   |
| Cl(1) | Ti(1) | N(2)  | 85.85(2)   | Cl(1) | Ti(1) | N(4)  | 89.45(2)   |
| Cl(1) | Ti(1) | N(6)  | 164.69(3)  | Cl(2) | Ti(1) | O(1)  | 100.28(2)  |
| Cl(2) | Ti(1) | N(2)  | 89.96(2)   | Cl(2) | Ti(1) | N(4)  | 167.67(3)  |
| Cl(2) | Ti(1) | N(6)  | 88.42(2)   | O(1)  | Ti(1) | N(2)  | 169.08(3)  |
| O(1)  | Ti(1) | N(4)  | 89.58(3)   | O(1)  | Ti(1) | N(6)  | 96.67(3)   |
| N(2)  | Ti(1) | N(4)  | 79.79(3)   | N(2)  | Ti(1) | N(6)  | 79.69(3)   |
| N(4)  | Ti(1) | N(6)  | 83.07(3)   | Ti(1) | O(1)  | C(10) | 149.72(7)  |
| N(2)  | N(1)  | C(1)  | 109.72(9)  | N(2)  | N(1)  | B(1)  | 119.14(8)  |
| C(1)  | N(1)  | B(1)  | 131.13(10) | Ti(1) | N(2)  | N(1)  | 123.04(6)  |
| Ti(1) | N(2)  | C(3)  | 130.32(7)  | N(1)  | N(2)  | C(3)  | 106.60(9)  |
| N(4)  | N(3)  | C(4)  | 109.42(11) | N(4)  | N(3)  | B(1)  | 119.72(9)  |
| C(4)  | N(3)  | B(1)  | 130.55(11) | Ti(1) | N(4)  | N(3)  | 123.89(7)  |
| Ti(1) | N(4)  | C(6)  | 129.21(9)  | N(3)  | N(4)  | C(6)  | 106.79(10) |
| N(6)  | N(5)  | C(7)  | 109.65(10) | N(6)  | N(5)  | B(1)  | 119.46(9)  |
| C(7)  | N(5)  | B(1)  | 130.33(11) | Ti(1) | N(6)  | N(5)  | 123.95(7)  |
| Ti(1) | N(6)  | C(9)  | 129.66(8)  | N(5)  | N(6)  | C(9)  | 106.27(10) |
| N(1)  | C(1)  | C(2)  | 108.74(10) | C(1)  | C(2)  | C(3)  | 104.67(10) |
| N(2)  | C(3)  | C(2)  | 110.26(10) | N(3)  | C(4)  | C(5)  | 108.56(13) |
| C(4)  | C(5)  | C(6)  | 105.39(12) | N(4)  | C(6)  | C(5)  | 109.84(13) |
| N(5)  | C(7)  | C(8)  | 108.68(12) | C(7)  | C(8)  | C(9)  | 105.45(12) |
| N(6)  | C(9)  | C(8)  | 109.94(11) | O(1)  | C(10) | C(11) | 119.08(9)  |
| O(1)  | C(10) | C(15) | 119.43(10) | C(11) | C(10) | C(15) | 121.42(10) |
| C(10) | C(11) | C(12) | 117.96(10) | C(10) | C(11) | C(16) | 122.95(10) |
| C(12) | C(11) | C(16) | 119.00(10) | C(11) | C(12) | C(13) | 121.30(11) |
| C(12) | C(13) | C(14) | 119.94(12) | C(13) | C(14) | C(15) | 121.23(12) |
| C(10) | C(15) | C(14) | 117.87(11) | C(10) | C(15) | C(22) | 122.58(10) |
| C(14) | C(15) | C(22) | 119.55(10) | C(11) | C(16) | C(17) | 120.62(11) |
| C(11) | C(16) | C(21) | 120.25(10) | C(17) | C(16) | C(21) | 118.72(11) |
| C(16) | C(17) | C(18) | 119.98(12) | C(17) | C(18) | C(19) | 120.57(13) |
| C(18) | C(19) | C(20) | 119.55(14) | C(19) | C(20) | C(21) | 120.58(13) |
| C(16) | C(21) | C(20) | 120.59(12) | C(15) | C(22) | C(23) | 120.16(11) |
| C(15) | C(22) | C(27) | 121.57(10) | C(23) | C(22) | C(27) | 118.26(11) |
| C(22) | C(23) | C(24) | 121.15(12) | C(23) | C(24) | C(25) | 120.09(13) |
| C(24) | C(25) | C(26) | 119.23(12) | C(25) | C(26) | C(27) | 121.02(12) |
| C(22) | C(27) | C(26) | 120.25(11) | N(1)  | B(1)  | N(3)  | 106.88(10) |
| N(1)  | B(1)  | N(5)  | 106.52(10) | N(3)  | B(1)  | N(5)  | 108.31(9)  |

Table 7. Bond angles involving hydrogens (°)

|       |       |       |       |       |       |       |       |
|-------|-------|-------|-------|-------|-------|-------|-------|
| atom  | atom  | atom  | angle | atom  | atom  | atom  | angle |
| N(1)  | C(1)  | H(2)  | 125.6 | C(2)  | C(1)  | H(2)  | 125.6 |
| C(1)  | C(2)  | H(3)  | 127.7 | C(3)  | C(2)  | H(3)  | 127.7 |
| N(2)  | C(3)  | H(4)  | 124.8 | C(2)  | C(3)  | H(4)  | 124.9 |
| N(3)  | C(4)  | H(5)  | 125.8 | C(5)  | C(4)  | H(5)  | 125.6 |
| C(4)  | C(5)  | H(6)  | 127.4 | C(6)  | C(5)  | H(6)  | 127.2 |
| N(4)  | C(6)  | H(7)  | 125.0 | C(5)  | C(6)  | H(7)  | 125.1 |
| N(5)  | C(7)  | H(8)  | 125.6 | C(8)  | C(7)  | H(8)  | 125.7 |
| C(7)  | C(8)  | H(9)  | 127.2 | C(9)  | C(8)  | H(9)  | 127.4 |
| N(6)  | C(9)  | H(10) | 125.1 | C(8)  | C(9)  | H(10) | 124.9 |
| C(11) | C(12) | H(11) | 119.3 | C(13) | C(12) | H(11) | 119.4 |
| C(12) | C(13) | H(12) | 120.0 | C(14) | C(13) | H(12) | 120.0 |
| C(13) | C(14) | H(13) | 119.4 | C(15) | C(14) | H(13) | 119.3 |
| C(16) | C(17) | H(14) | 120.0 | C(18) | C(17) | H(14) | 120.0 |
| C(17) | C(18) | H(15) | 119.7 | C(19) | C(18) | H(15) | 119.8 |
| C(18) | C(19) | H(16) | 120.2 | C(20) | C(19) | H(16) | 120.3 |
| C(19) | C(20) | H(17) | 119.7 | C(21) | C(20) | H(17) | 119.7 |
| C(16) | C(21) | H(18) | 119.7 | C(20) | C(21) | H(18) | 119.7 |
| C(22) | C(23) | H(19) | 119.5 | C(24) | C(23) | H(19) | 119.3 |
| C(23) | C(24) | H(20) | 120.0 | C(25) | C(24) | H(20) | 119.9 |
| C(24) | C(25) | H(21) | 120.3 | C(26) | C(25) | H(21) | 120.5 |
| C(25) | C(26) | H(22) | 119.5 | C(27) | C(26) | H(22) | 119.5 |
| C(22) | C(27) | H(23) | 119.8 | C(26) | C(27) | H(23) | 119.9 |
| N(1)  | B(1)  | H(1)  | 110.7 | N(3)  | B(1)  | H(1)  | 113.9 |
| N(5)  | B(1)  | H(1)  | 110.2 |       |       |       |       |

Table 8. Torsion Angles(°)

| atom1 | atom2 | atom3 | atom4 | angle       | atom1 | atom2 | atom3 | atom4 | angle       |
|-------|-------|-------|-------|-------------|-------|-------|-------|-------|-------------|
| Cl(1) | Ti(1) | O(1)  | C(10) | 47.48(14)   | Cl(1) | Ti(1) | N(2)  | N(1)  | -133.06(9)  |
| Cl(1) | Ti(1) | N(2)  | C(3)  | 49.51(10)   | Cl(1) | Ti(1) | N(4)  | N(3)  | 129.53(8)   |
| Cl(1) | Ti(1) | N(4)  | C(6)  | -46.14(11)  | Cl(1) | Ti(1) | N(6)  | N(5)  | -25.11(17)  |
| Cl(1) | Ti(1) | N(6)  | C(9)  | 150.50(9)   | Cl(2) | Ti(1) | O(1)  | C(10) | 145.51(13)  |
| Cl(2) | Ti(1) | N(2)  | N(1)  | 130.26(9)   | Cl(2) | Ti(1) | N(2)  | C(3)  | -47.17(11)  |
| Cl(2) | Ti(1) | N(4)  | N(3)  | 9.5(2)      | Cl(2) | Ti(1) | N(4)  | C(6)  | -166.12(10) |
| Cl(2) | Ti(1) | N(6)  | N(5)  | -134.90(8)  | Cl(2) | Ti(1) | N(6)  | C(9)  | 40.71(10)   |
| O(1)  | Ti(1) | N(2)  | N(1)  | -29.5(2)    | O(1)  | Ti(1) | N(2)  | C(3)  | 153.05(17)  |
| N(2)  | Ti(1) | O(1)  | C(10) | -55.1(2)    | O(1)  | Ti(1) | N(4)  | N(3)  | -133.86(9)  |
| O(1)  | Ti(1) | N(4)  | C(6)  | 50.48(11)   | N(4)  | Ti(1) | O(1)  | C(10) | -41.92(14)  |
| O(1)  | Ti(1) | N(6)  | N(5)  | 124.93(9)   | O(1)  | Ti(1) | N(6)  | C(9)  | -59.46(11)  |
| N(6)  | Ti(1) | O(1)  | C(10) | -124.89(14) | N(2)  | Ti(1) | N(4)  | N(3)  | 43.64(9)    |
| N(2)  | Ti(1) | N(4)  | C(6)  | -132.03(11) | N(4)  | Ti(1) | N(2)  | N(1)  | -42.87(9)   |
| N(4)  | Ti(1) | N(2)  | C(3)  | 139.70(11)  | N(2)  | Ti(1) | N(6)  | N(5)  | -44.65(8)   |
| N(2)  | Ti(1) | N(6)  | C(9)  | 130.96(11)  | N(6)  | Ti(1) | N(2)  | N(1)  | 41.86(9)    |
| N(6)  | Ti(1) | N(2)  | C(3)  | -135.57(11) | N(4)  | Ti(1) | N(6)  | N(5)  | 36.17(9)    |
| N(4)  | Ti(1) | N(6)  | C(9)  | -148.22(11) | N(6)  | Ti(1) | N(4)  | N(3)  | -37.08(9)   |
| N(6)  | Ti(1) | N(4)  | C(6)  | 147.25(11)  | Ti(1) | O(1)  | C(10) | C(11) | 91.68(15)   |
| Ti(1) | O(1)  | C(10) | C(15) | -85.19(16)  | N(2)  | N(1)  | C(1)  | C(2)  | 0.28(15)    |
| C(1)  | N(1)  | N(2)  | Ti(1) | -177.76(8)  | C(1)  | N(1)  | N(2)  | C(3)  | 0.20(13)    |
| N(2)  | N(1)  | B(1)  | N(3)  | 56.99(14)   | N(2)  | N(1)  | B(1)  | N(5)  | -58.63(13)  |
| B(1)  | N(1)  | N(2)  | Ti(1) | 1.11(14)    | B(1)  | N(1)  | N(2)  | C(3)  | 179.06(10)  |
| C(1)  | N(1)  | B(1)  | N(3)  | -124.43(13) | C(1)  | N(1)  | B(1)  | N(5)  | 119.95(13)  |
| B(1)  | N(1)  | C(1)  | C(2)  | -178.41(12) | Ti(1) | N(2)  | C(3)  | C(2)  | 177.15(8)   |
| N(1)  | N(2)  | C(3)  | C(2)  | -0.60(14)   | N(4)  | N(3)  | C(4)  | C(5)  | -0.37(15)   |
| C(4)  | N(3)  | N(4)  | Ti(1) | -176.62(8)  | C(4)  | N(3)  | N(4)  | C(6)  | -0.13(13)   |
| N(4)  | N(3)  | B(1)  | N(1)  | -57.12(13)  | N(4)  | N(3)  | B(1)  | N(5)  | 57.30(13)   |
| B(1)  | N(3)  | N(4)  | Ti(1) | -2.37(14)   | B(1)  | N(3)  | N(4)  | C(6)  | 174.12(10)  |
| C(4)  | N(3)  | B(1)  | N(1)  | 115.73(13)  | C(4)  | N(3)  | B(1)  | N(5)  | -129.85(13) |
| B(1)  | N(3)  | C(4)  | C(5)  | -173.78(12) | Ti(1) | N(4)  | C(6)  | C(5)  | 176.81(9)   |
| N(3)  | N(4)  | C(6)  | C(5)  | 0.57(14)    | N(6)  | N(5)  | C(7)  | C(8)  | -0.02(11)   |
| C(7)  | N(5)  | N(6)  | Ti(1) | 176.28(8)   | C(7)  | N(5)  | N(6)  | C(9)  | -0.20(13)   |
| N(6)  | N(5)  | B(1)  | N(1)  | 56.47(13)   | N(6)  | N(5)  | B(1)  | N(3)  | -58.18(13)  |
| B(1)  | N(5)  | N(6)  | Ti(1) | 4.01(14)    | B(1)  | N(5)  | N(6)  | C(9)  | -172.47(10) |
| C(7)  | N(5)  | B(1)  | N(1)  | -113.97(13) | C(7)  | N(5)  | B(1)  | N(3)  | 131.38(13)  |
| B(1)  | N(5)  | C(7)  | C(8)  | 171.15(12)  | Ti(1) | N(6)  | C(9)  | C(8)  | -175.87(9)  |
| N(5)  | N(6)  | C(9)  | C(8)  | 0.34(14)    | N(1)  | C(1)  | C(2)  | C(3)  | -0.62(15)   |

Table 8. Torsion angles ( $^{\circ}$ ) (continued)

| atom1 | atom2 | atom3 | atom4 | angle       | atom1 | atom2 | atom3 | atom4 | angle       |
|-------|-------|-------|-------|-------------|-------|-------|-------|-------|-------------|
| C(1)  | C(2)  | C(3)  | N(2)  | 0.75(14)    | N(3)  | C(4)  | C(5)  | C(6)  | 0.69(16)    |
| C(4)  | C(5)  | C(6)  | N(4)  | -0.78(16)   | N(5)  | C(7)  | C(8)  | C(9)  | 0.22(15)    |
| C(7)  | C(8)  | C(9)  | N(6)  | -0.35(15)   | O(1)  | C(10) | C(11) | C(12) | -170.48(10) |
| O(1)  | C(10) | C(11) | C(16) | 13.09(16)   | O(1)  | C(10) | C(15) | C(14) | 172.38(10)  |
| O(1)  | C(10) | C(15) | C(22) | -8.04(16)   | C(11) | C(10) | C(15) | C(14) | -4.42(16)   |
| C(11) | C(10) | C(15) | C(22) | 175.16(10)  | C(15) | C(10) | C(11) | C(12) | 6.32(16)    |
| C(15) | C(10) | C(11) | C(16) | -170.10(10) | C(10) | C(11) | C(12) | C(13) | -3.59(18)   |
| C(10) | C(11) | C(16) | C(17) | -132.41(13) | C(10) | C(11) | C(16) | C(21) | 55.02(16)   |
| C(12) | C(11) | C(16) | C(17) | 51.20(16)   | C(12) | C(11) | C(16) | C(21) | -121.37(13) |
| C(16) | C(11) | C(12) | C(13) | 172.98(11)  | C(11) | C(12) | C(13) | C(14) | -1.0(2)     |
| C(12) | C(13) | C(14) | C(15) | 3.0(2)      | C(13) | C(14) | C(15) | C(10) | -0.31(18)   |
| C(13) | C(14) | C(15) | C(22) | -179.90(11) | C(10) | C(15) | C(22) | C(23) | 138.08(12)  |
| C(10) | C(15) | C(22) | C(27) | -42.72(16)  | C(14) | C(15) | C(22) | C(23) | -42.35(16)  |
| C(14) | C(15) | C(22) | C(27) | 136.85(12)  | C(11) | C(16) | C(17) | C(18) | -171.39(12) |
| C(11) | C(16) | C(21) | C(20) | 171.56(12)  | C(17) | C(16) | C(21) | C(20) | -1.15(19)   |
| C(21) | C(16) | C(17) | C(18) | 1.3(2)      | C(16) | C(17) | C(18) | C(19) | -0.3(2)     |
| C(17) | C(18) | C(19) | C(20) | -1.0(2)     | C(18) | C(19) | C(20) | C(21) | 1.1(2)      |
| C(19) | C(20) | C(21) | C(16) | -0.05(16)   | C(15) | C(22) | C(23) | C(24) | 179.95(10)  |
| C(15) | C(22) | C(27) | C(26) | -179.86(11) | C(23) | C(22) | C(27) | C(26) | -0.64(17)   |
| C(27) | C(22) | C(23) | C(24) | 0.73(18)    | C(22) | C(23) | C(24) | C(25) | -0.06(15)   |
| C(23) | C(24) | C(25) | C(26) | -0.7(2)     | C(24) | C(25) | C(26) | C(27) | 0.8(2)      |
| C(25) | C(26) | C(27) | C(22) | -0.10(19)   |       |       |       |       |             |

The sign is positive if when looking from atom 2 to atom 3 a clock-wise motion of atom 1 would superimpose it on atom 4.



Table 9. Distances beyond the asymmetric unit out to 3.60 Å

| atom  | atom                | distance   | atom  | atom                | distance   |
|-------|---------------------|------------|-------|---------------------|------------|
| Cl(1) | C(17) <sup>1)</sup> | 3.4616(14) | Cl(2) | C(14) <sup>2)</sup> | 3.5924(13) |
| C(1)  | C(25) <sup>3)</sup> | 3.4992(18) | C(1)  | C(26) <sup>3)</sup> | 3.5249(18) |
| C(2)  | C(25) <sup>3)</sup> | 3.5783(18) | C(4)  | C(9) <sup>4)</sup>  | 3.5949(19) |
| C(9)  | C(4) <sup>5)</sup>  | 3.5949(19) | C(14) | Cl(2) <sup>6)</sup> | 3.5924(13) |
| C(17) | Cl(1) <sup>7)</sup> | 3.4616(14) | C(25) | C(1) <sup>8)</sup>  | 3.4992(18) |
| C(25) | C(2) <sup>8)</sup>  | 3.5783(18) | C(26) | C(1) <sup>8)</sup>  | 3.5249(18) |

Symmetry Operators:

- |                           |                           |
|---------------------------|---------------------------|
| (1) $-X+1/2+1,-Y,Z+1/2$   | (2) $-X+2,Y+1/2,-Z+1/2$   |
| (3) $X-1,Y,Z$             | (4) $-X+1,Y+1/2-1,-Z+1/2$ |
| (5) $-X+1,Y+1/2,-Z+1/2$   | (6) $-X+2,Y+1/2-1,-Z+1/2$ |
| (7) $-X+1/2+1,-Y,Z+1/2-1$ | (8) $X+1,Y,Z$             |

Table 10. Distances beyond the asymmetric unit out to 3.60 Å involving hydrogens

| atom  | atom                 | distance | atom  | atom                 | distance |
|-------|----------------------|----------|-------|----------------------|----------|
| Cl(1) | H(8) <sup>1)</sup>   | 3.149    | Cl(1) | H(9) <sup>1)</sup>   | 3.452    |
| Cl(1) | H(11) <sup>2)</sup>  | 3.313    | Cl(1) | H(14) <sup>2)</sup>  | 2.942    |
| Cl(1) | H(15) <sup>2)</sup>  | 3.494    | Cl(2) | H(3) <sup>3)</sup>   | 3.147    |
| Cl(2) | H(5) <sup>4)</sup>   | 3.020    | Cl(2) | H(12) <sup>5)</sup>  | 3.028    |
| Cl(2) | H(13) <sup>5)</sup>  | 2.905    | Cl(2) | H(21) <sup>6)</sup>  | 3.058    |
| N(1)  | H(6) <sup>4)</sup>   | 3.119    | N(1)  | H(9) <sup>1)</sup>   | 2.960    |
| N(2)  | H(6) <sup>4)</sup>   | 3.025    | N(2)  | H(9) <sup>1)</sup>   | 2.798    |
| N(4)  | H(9) <sup>1)</sup>   | 3.569    | C(1)  | H(6) <sup>4)</sup>   | 3.039    |
| C(1)  | H(9) <sup>1)</sup>   | 3.031    | C(2)  | H(6) <sup>4)</sup>   | 2.873    |
| C(2)  | H(9) <sup>1)</sup>   | 2.923    | C(2)  | H(12) <sup>2)</sup>  | 3.007    |
| C(2)  | H(21) <sup>7)</sup>  | 3.564    | C(2)  | H(22) <sup>6)</sup>  | 3.420    |
| C(3)  | H(6) <sup>4)</sup>   | 2.859    | C(3)  | H(9) <sup>1)</sup>   | 2.744    |
| C(3)  | H(11) <sup>2)</sup>  | 3.255    | C(3)  | H(12) <sup>2)</sup>  | 3.218    |
| C(3)  | H(21) <sup>6)</sup>  | 3.033    | C(3)  | H(22) <sup>6)</sup>  | 3.045    |
| C(4)  | H(20) <sup>8)</sup>  | 3.426    | C(4)  | H(21) <sup>8)</sup>  | 3.358    |
| C(5)  | H(21) <sup>8)</sup>  | 3.325    | C(7)  | H(11) <sup>9)</sup>  | 3.195    |
| C(8)  | H(11) <sup>9)</sup>  | 3.092    | C(10) | H(16) <sup>10)</sup> | 3.025    |
| C(11) | H(16) <sup>10)</sup> | 2.882    | C(12) | H(4) <sup>8)</sup>   | 3.407    |
| C(12) | H(8) <sup>10)</sup>  | 3.514    | C(12) | H(9) <sup>10)</sup>  | 3.371    |
| C(12) | H(16) <sup>10)</sup> | 2.883    | C(12) | H(17) <sup>10)</sup> | 3.599    |
| C(12) | H(22) <sup>11)</sup> | 3.541    | C(13) | H(3) <sup>8)</sup>   | 3.485    |
| C(13) | H(4) <sup>8)</sup>   | 3.451    | C(13) | H(16) <sup>10)</sup> | 2.981    |
| C(13) | H(17) <sup>10)</sup> | 3.267    | C(13) | H(22) <sup>11)</sup> | 3.009    |
| C(14) | H(16) <sup>10)</sup> | 3.044    | C(15) | H(16) <sup>10)</sup> | 3.084    |
| C(16) | H(8) <sup>10)</sup>  | 3.226    | C(17) | H(8) <sup>10)</sup>  | 3.045    |
| C(18) | H(8) <sup>10)</sup>  | 3.199    | C(18) | H(18) <sup>9)</sup>  | 3.512    |
| C(18) | H(19) <sup>8)</sup>  | 3.574    | C(18) | H(20) <sup>8)</sup>  | 3.466    |
| C(19) | H(1) <sup>10)</sup>  | 3.536    | C(19) | H(8) <sup>10)</sup>  | 3.515    |
| C(20) | H(20) <sup>5)</sup>  | 3.284    | C(21) | H(8) <sup>10)</sup>  | 3.547    |
| C(21) | H(20) <sup>5)</sup>  | 3.363    | C(22) | H(2) <sup>12)</sup>  | 3.029    |
| C(23) | H(2) <sup>12)</sup>  | 3.143    | C(23) | H(10) <sup>11)</sup> | 3.298    |
| C(23) | H(15) <sup>2)</sup>  | 2.936    | C(23) | H(18) <sup>11)</sup> | 3.580    |
| C(24) | H(2) <sup>12)</sup>  | 3.082    | C(24) | H(5) <sup>2)</sup>   | 3.502    |
| C(24) | H(15) <sup>2)</sup>  | 2.990    | C(24) | H(17) <sup>11)</sup> | 3.453    |
| C(24) | H(18) <sup>11)</sup> | 3.482    | C(25) | H(2) <sup>12)</sup>  | 2.883    |
| C(25) | H(3) <sup>12)</sup>  | 3.088    | C(25) | H(4) <sup>3)</sup>   | 3.052    |
| C(25) | H(5) <sup>2)</sup>   | 3.475    | C(25) | H(6) <sup>2)</sup>   | 3.381    |

Table 10. Distances beyond the asymmetric unit out to 3.60 Å involving hydrogens (continued)

| atom  | atom                | distance | atom  | atom                | distance |
|-------|---------------------|----------|-------|---------------------|----------|
| C(26) | H(2) <sup>12)</sup> | 2.719    | C(26) | H(4) <sup>3)</sup>  | 2.945    |
| C(26) | H(12) <sup>5)</sup> | 3.472    | C(27) | H(2) <sup>12)</sup> | 2.798    |
| H(1)  | C(19) <sup>9)</sup> | 3.536    | H(1)  | H(16) <sup>9)</sup> | 3.529    |
| H(2)  | C(22) <sup>7)</sup> | 3.029    | H(2)  | C(23) <sup>7)</sup> | 3.143    |
| H(2)  | C(24) <sup>7)</sup> | 3.082    | H(2)  | C(25) <sup>7)</sup> | 2.883    |
| H(2)  | C(26) <sup>7)</sup> | 2.719    | H(2)  | C(27) <sup>7)</sup> | 2.798    |
| H(2)  | H(6) <sup>4)</sup>  | 3.573    | H(2)  | H(21) <sup>7)</sup> | 3.413    |
| H(2)  | H(22) <sup>7)</sup> | 3.167    | H(2)  | H(23) <sup>7)</sup> | 3.282    |
| H(3)  | Cl(2) <sup>6)</sup> | 3.147    | H(3)  | C(13) <sup>2)</sup> | 3.485    |
| H(3)  | C(25) <sup>7)</sup> | 3.088    | H(3)  | H(6) <sup>4)</sup>  | 3.305    |
| H(3)  | H(9) <sup>1)</sup>  | 3.454    | H(3)  | H(12) <sup>2)</sup> | 2.530    |
| H(3)  | H(21) <sup>7)</sup> | 2.851    | H(3)  | H(22) <sup>6)</sup> | 3.146    |
| H(4)  | C(12) <sup>2)</sup> | 3.407    | H(4)  | C(13) <sup>2)</sup> | 3.451    |
| H(4)  | C(25) <sup>6)</sup> | 3.052    | H(4)  | C(26) <sup>6)</sup> | 2.945    |
| H(4)  | H(6) <sup>4)</sup>  | 3.286    | H(4)  | H(9) <sup>1)</sup>  | 3.166    |
| H(4)  | H(11) <sup>2)</sup> | 2.840    | H(4)  | H(12) <sup>2)</sup> | 2.931    |
| H(4)  | H(21) <sup>6)</sup> | 2.527    | H(4)  | H(22) <sup>6)</sup> | 2.290    |
| H(5)  | Cl(2) <sup>1)</sup> | 3.020    | H(5)  | C(24) <sup>8)</sup> | 3.502    |
| H(5)  | C(25) <sup>8)</sup> | 3.475    | H(5)  | H(10) <sup>1)</sup> | 3.548    |
| H(5)  | H(13) <sup>7)</sup> | 3.416    | H(5)  | H(17) <sup>9)</sup> | 3.367    |
| H(5)  | H(20) <sup>8)</sup> | 2.898    | H(5)  | H(21) <sup>8)</sup> | 2.846    |
| H(6)  | N(1) <sup>1)</sup>  | 3.119    | H(6)  | N(2) <sup>1)</sup>  | 3.025    |
| H(6)  | C(1) <sup>1)</sup>  | 3.039    | H(6)  | C(2) <sup>1)</sup>  | 2.873    |
| H(6)  | C(3) <sup>1)</sup>  | 2.859    | H(6)  | C(25) <sup>8)</sup> | 3.381    |
| H(6)  | H(2) <sup>1)</sup>  | 3.573    | H(6)  | H(3) <sup>1)</sup>  | 3.305    |
| H(6)  | H(4) <sup>1)</sup>  | 3.286    | H(6)  | H(21) <sup>8)</sup> | 2.801    |
| H(8)  | Cl(1) <sup>4)</sup> | 3.149    | H(8)  | C(12) <sup>9)</sup> | 3.514    |
| H(8)  | C(16) <sup>9)</sup> | 3.226    | H(8)  | C(17) <sup>9)</sup> | 3.045    |
| H(8)  | C(18) <sup>9)</sup> | 3.199    | H(8)  | C(19) <sup>9)</sup> | 3.515    |
| H(8)  | C(21) <sup>9)</sup> | 3.547    | H(8)  | H(11) <sup>9)</sup> | 2.810    |
| H(8)  | H(14) <sup>9)</sup> | 3.382    | H(9)  | Cl(1) <sup>4)</sup> | 3.452    |
| H(9)  | N(1) <sup>4)</sup>  | 2.960    | H(9)  | N(2) <sup>4)</sup>  | 2.798    |
| H(9)  | N(4) <sup>4)</sup>  | 3.569    | H(9)  | C(1) <sup>4)</sup>  | 3.031    |
| H(9)  | C(2) <sup>4)</sup>  | 2.923    | H(9)  | C(3) <sup>4)</sup>  | 2.744    |
| H(9)  | C(12) <sup>9)</sup> | 3.371    | H(9)  | H(3) <sup>4)</sup>  | 3.454    |
| H(9)  | H(4) <sup>4)</sup>  | 3.166    | H(9)  | H(11) <sup>9)</sup> | 2.610    |
| H(9)  | H(12) <sup>9)</sup> | 3.482    | H(10) | C(23) <sup>5)</sup> | 3.298    |

Table 10. Distances beyond the asymmetric unit out to 3.60 Å involving hydrogens (continued)

| atom  | atom                 | distance | atom  | atom                 | distance |
|-------|----------------------|----------|-------|----------------------|----------|
| H(10) | H(5) <sup>4)</sup>   | 3.548    | H(10) | H(13) <sup>5)</sup>  | 2.929    |
| H(10) | H(19) <sup>5)</sup>  | 2.886    | H(10) | H(20) <sup>5)</sup>  | 3.583    |
| H(11) | Cl(1) <sup>8)</sup>  | 3.313    | H(11) | C(3) <sup>8)</sup>   | 3.255    |
| H(11) | C(7) <sup>10)</sup>  | 3.195    | H(11) | C(8) <sup>10)</sup>  | 3.092    |
| H(11) | H(4) <sup>8)</sup>   | 2.840    | H(11) | H(8) <sup>10)</sup>  | 2.810    |
| H(11) | H(9) <sup>10)</sup>  | 2.610    | H(11) | H(16) <sup>10)</sup> | 3.406    |
| H(11) | H(22) <sup>11)</sup> | 3.587    | H(12) | Cl(2) <sup>11)</sup> | 3.028    |
| H(12) | C(2) <sup>8)</sup>   | 3.007    | H(12) | C(3) <sup>8)</sup>   | 3.218    |
| H(12) | C(26) <sup>11)</sup> | 3.472    | H(12) | H(3) <sup>8)</sup>   | 2.530    |
| H(12) | H(4) <sup>8)</sup>   | 2.931    | H(12) | H(9) <sup>10)</sup>  | 3.482    |
| H(12) | H(16) <sup>10)</sup> | 3.554    | H(12) | H(17) <sup>10)</sup> | 3.165    |
| H(12) | H(22) <sup>11)</sup> | 2.636    | H(13) | Cl(2) <sup>11)</sup> | 2.905    |
| H(13) | H(5) <sup>12)</sup>  | 3.416    | H(13) | H(10) <sup>11)</sup> | 2.929    |
| H(13) | H(23) <sup>11)</sup> | 3.472    | H(14) | Cl(1) <sup>8)</sup>  | 2.942    |
| H(14) | H(8) <sup>10)</sup>  | 3.382    | H(15) | Cl(1) <sup>8)</sup>  | 3.494    |
| H(15) | C(23) <sup>8)</sup>  | 2.936    | H(15) | C(24) <sup>8)</sup>  | 2.990    |
| H(15) | H(18) <sup>9)</sup>  | 2.950    | H(15) | H(19) <sup>8)</sup>  | 2.618    |
| H(15) | H(20) <sup>8)</sup>  | 2.724    | H(16) | C(10) <sup>9)</sup>  | 3.025    |
| H(16) | C(11) <sup>9)</sup>  | 2.882    | H(16) | C(12) <sup>9)</sup>  | 2.883    |
| H(16) | C(13) <sup>9)</sup>  | 2.981    | H(16) | C(14) <sup>9)</sup>  | 3.044    |
| H(16) | C(15) <sup>9)</sup>  | 3.084    | H(16) | H(1) <sup>10)</sup>  | 3.529    |
| H(16) | H(11) <sup>9)</sup>  | 3.406    | H(16) | H(12) <sup>9)</sup>  | 3.554    |
| H(16) | H(18) <sup>9)</sup>  | 3.181    | H(17) | C(12) <sup>9)</sup>  | 3.599    |
| H(17) | C(13) <sup>9)</sup>  | 3.267    | H(17) | C(24) <sup>5)</sup>  | 3.453    |
| H(17) | H(5) <sup>10)</sup>  | 3.367    | H(17) | H(12) <sup>9)</sup>  | 3.165    |
| H(17) | H(20) <sup>5)</sup>  | 2.634    | H(18) | C(18) <sup>10)</sup> | 3.512    |
| H(18) | C(23) <sup>5)</sup>  | 3.580    | H(18) | C(24) <sup>5)</sup>  | 3.482    |
| H(18) | H(15) <sup>10)</sup> | 2.950    | H(18) | H(16) <sup>10)</sup> | 3.181    |
| H(18) | H(19) <sup>5)</sup>  | 2.985    | H(18) | H(20) <sup>5)</sup>  | 2.794    |
| H(19) | C(18) <sup>2)</sup>  | 3.574    | H(19) | H(10) <sup>11)</sup> | 2.886    |
| H(19) | H(15) <sup>2)</sup>  | 2.618    | H(19) | H(18) <sup>11)</sup> | 2.985    |
| H(19) | H(23) <sup>11)</sup> | 3.551    | H(20) | C(4) <sup>2)</sup>   | 3.426    |
| H(20) | C(18) <sup>2)</sup>  | 3.466    | H(20) | C(20) <sup>11)</sup> | 3.284    |
| H(20) | C(21) <sup>11)</sup> | 3.363    | H(20) | H(5) <sup>2)</sup>   | 2.898    |
| H(20) | H(10) <sup>11)</sup> | 3.583    | H(20) | H(15) <sup>2)</sup>  | 2.724    |
| H(20) | H(17) <sup>11)</sup> | 2.634    | H(20) | H(18) <sup>11)</sup> | 2.794    |
| H(21) | Cl(2) <sup>3)</sup>  | 3.058    | H(21) | C(2) <sup>12)</sup>  | 3.564    |

Table 10. Distances beyond the asymmetric unit out to 3.60 Å involving hydrogens (continued)

| atom  | atom                | distance | atom  | atom                | distance |
|-------|---------------------|----------|-------|---------------------|----------|
| H(21) | C(3) <sup>3)</sup>  | 3.033    | H(21) | C(4) <sup>2)</sup>  | 3.358    |
| H(21) | C(5) <sup>2)</sup>  | 3.325    | H(21) | H(2) <sup>12)</sup> | 3.413    |
| H(21) | H(3) <sup>12)</sup> | 2.851    | H(21) | H(4) <sup>3)</sup>  | 2.527    |
| H(21) | H(5) <sup>2)</sup>  | 2.846    | H(21) | H(6) <sup>2)</sup>  | 2.801    |
| H(22) | C(2) <sup>3)</sup>  | 3.420    | H(22) | C(3) <sup>3)</sup>  | 3.045    |
| H(22) | C(12) <sup>5)</sup> | 3.541    | H(22) | C(13) <sup>5)</sup> | 3.009    |
| H(22) | H(2) <sup>12)</sup> | 3.167    | H(22) | H(3) <sup>3)</sup>  | 3.146    |
| H(22) | H(4) <sup>3)</sup>  | 2.290    | H(22) | H(11) <sup>5)</sup> | 3.587    |
| H(22) | H(12) <sup>5)</sup> | 2.636    | H(23) | H(2) <sup>12)</sup> | 3.282    |
| H(23) | H(13) <sup>5)</sup> | 3.472    | H(23) | H(19) <sup>5)</sup> | 3.551    |

Symmetry Operators:

- |                              |                             |
|------------------------------|-----------------------------|
| (1) $-X+1, Y+1/2-1, -Z+1/2$  | (2) $-X+1/2+1, -Y, Z+1/2$   |
| (3) $X+1/2, -Y+1/2, -Z+1$    | (4) $-X+1, Y+1/2, -Z+1/2$   |
| (5) $-X+2, Y+1/2, -Z+1/2$    | (6) $X+1/2-1, -Y+1/2, -Z+1$ |
| (7) $X-1, Y, Z$              | (8) $-X+1/2+1, -Y, Z+1/2-1$ |
| (9) $X+1/2-1, -Y+1/2, -Z$    | (10) $X+1/2, -Y+1/2, -Z$    |
| (11) $-X+2, Y+1/2-1, -Z+1/2$ | (12) $X+1, Y, Z$            |
